# Supplementary material for: An Independent Evolutionary Origin for Insect Deterrent Cucurbitacins in Iberis amara
Source: PubMed Central journal article supplement — Mol Biol Evol. 2021 Jul 15;38(11):4659–73. doi: 10.1093/molbev/msab213 (PMC8557398; doi:10.1093/molbev/msab213), 2021-07-15
Supplement: msab213_supplementary_data.pdf [file msab213_supplementary_data.pdf]

## Supplementary information

### An independent evolutionary origin for insect deterrent cucurbitacins in *Iberis amara*

Lemeng Dong<sup>1,6\*</sup>, Aldo Almeida<sup>1</sup>, Jacob Pollier<sup>2,3</sup>, Bekzod Khakimov<sup>4</sup>, Jean-Etienne Bassard<sup>1</sup>, Karel Miettinen<sup>2,3</sup>, Dan Stærk<sup>5</sup>, Rahimi, Mehran<sup>6</sup>, Carl Erik Olsen<sup>1</sup>, Mohammed Saddik Motawia<sup>1</sup>, Alain Goossens<sup>2,3</sup>, and Søren Bak<sup>1\*</sup>

<sup>1</sup>Department of Plant and Environmental Science, University of Copenhagen, Thorvaldsensvej 40, DK-1871 Frederiksberg C, Denmark. <sup>2</sup>Ghent University, Department of Plant Biotechnology and Bioinformatics, Technologiepark 71, 9052 Ghent, Belgium. <sup>3</sup>VIB Center for Plant Systems Biology, Technologiepark 71, 9052 Ghent, Belgium. <sup>4</sup>Department of Food Science, University of Copenhagen, Rolighedsvej 26, DK-1958 Frederiksberg C, Denmark. <sup>5</sup>Department of Drug Design and Pharmacology, Faculty of Health and Medical Sciences, University of Copenhagen, Universitetsparken 2, DK-2100 Copenhagen, Denmark. <sup>6</sup>Plant Hormone Biology group, Swammerdam Institute for Life Science, University of Amsterdam, Science Park 904, 1098 XH Amsterdam, the Netherlands

[\\*l.dong2@uva.nl](mailto:*l.dong2@uva.nl)

[bak@plen.ku.dk](mailto:bak@plen.ku.dk)

#### **This PDF file includes:**

Supplementary Figure 1 to Figure 11,

Supplementary Table 1 to Table 6,

Supplementary NMR data (general experimental procedures, data interpretation of compound 1-5, supplementary Figure 12 to Figure 19, Supplementary Table 7 to Table 11), and References

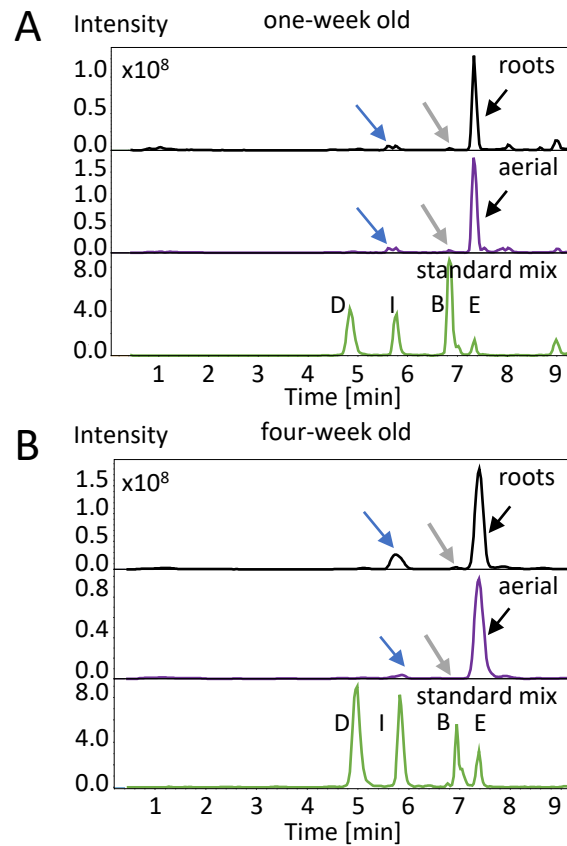

**Supplementary Figure 1 Cucurbitacin E, I, and B accumulate in both roots and aerial parts of *I. amara*.**

**(A)** LC-ESI-MS extracted ion chromatograms (EIC) of extracts from roots and aerial parts of one-week-old *I. amara* plants. **(B)** LC-ESI-MS extracted ion chromatograms (EIC) of extracts from roots and aerial parts of four-week-old *I. amara* plants. Extracted ions at  $m/z$  539, 537, 581, and 579 are representative for sodium adducts of cucurbitacin D, I, B, E, respectively. Peaks indicated by blue, gray and black arrows verified by the mass spectrum compare to the cucurbitacin standard I, B E, respectively.

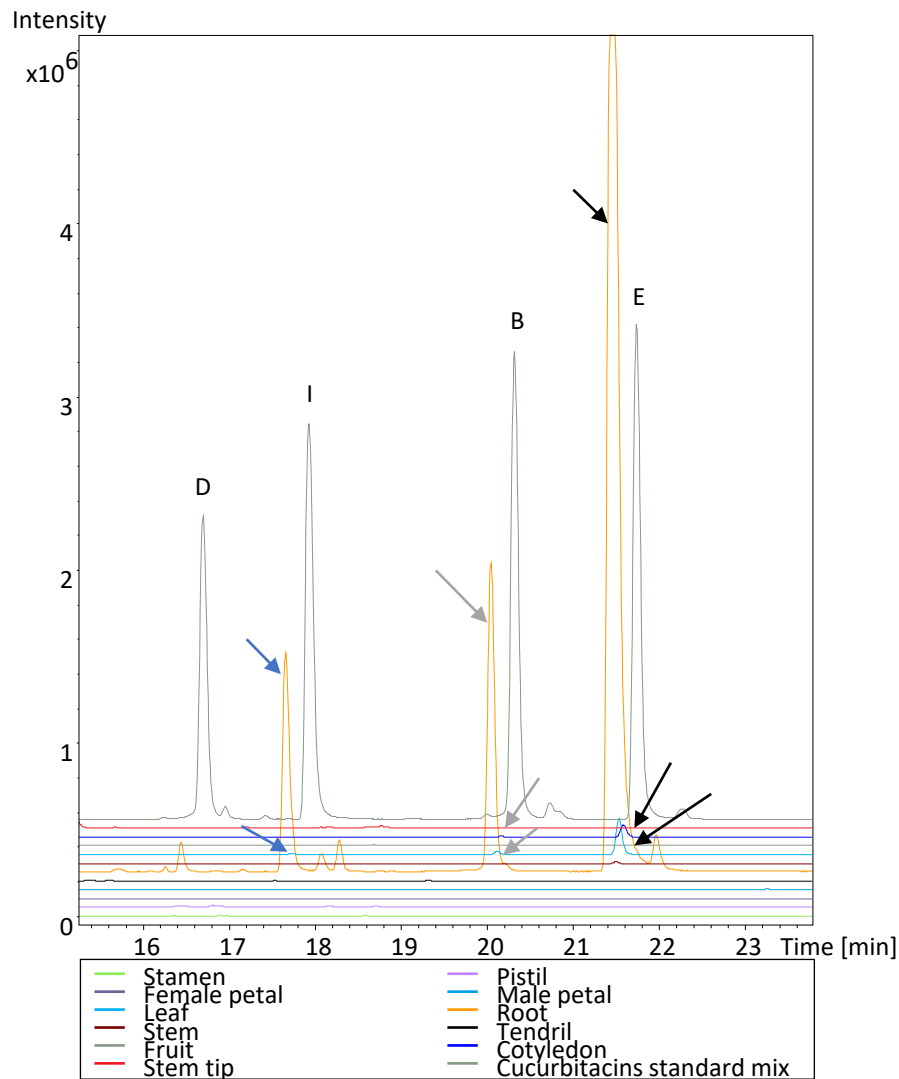

**Supplementary Figure 2 Cucurbitacins accumulate mainly in roots and leaves in *Citrullus lanatus*.** LC-QTOF-MS extracted ion chromatograms (EIC) of extracts from *C. lanatus* stamen, female petals, leaves, stems, fruits, stem tips, pistils, male petals, roots, tendrils, cotyledons. Extracted ions at  $m/z$  539, 537, 581, and 579 are representative for sodium adducts of cucurbitacin D, I, B, E, respectively. Peaks indicated by blue, gray and black arrows were verified by comparing their mass spectrum to the corresponding mass spectrum of standards of cucurbitacin I, B, E, respectively. Note, the LC-MS analysis program changed for analyzing *C. lanatus* extracts (see materials and methods), giving rise to the observed changes in retention times.

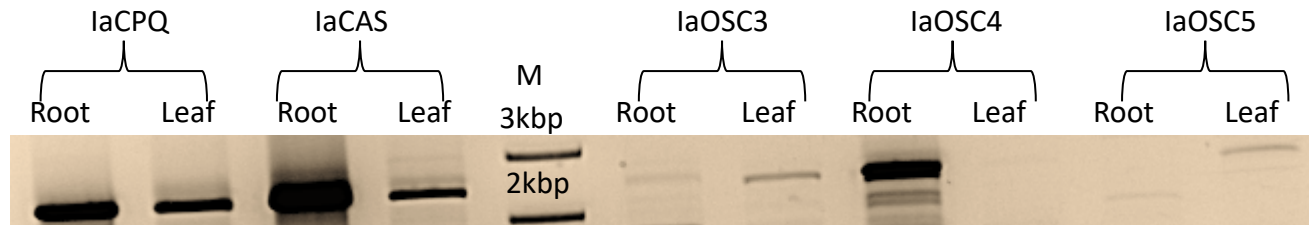

**Supplementary Figure 3** Agarose gel image of PCR product of 5 full-length OSCs from *I. amara*. Lane M, 1kb DNA ladder.

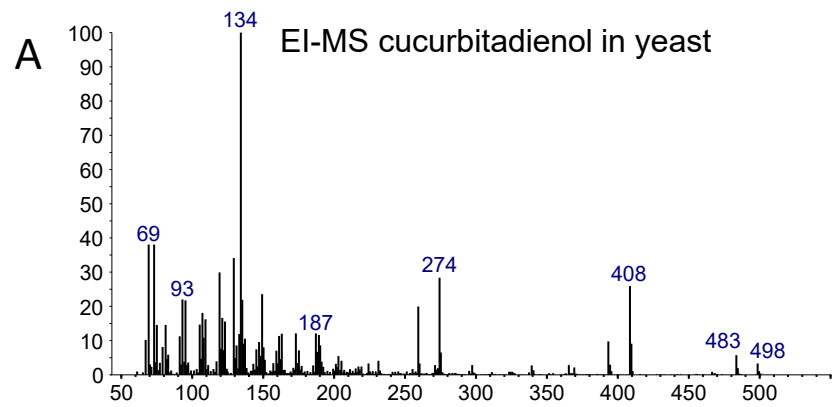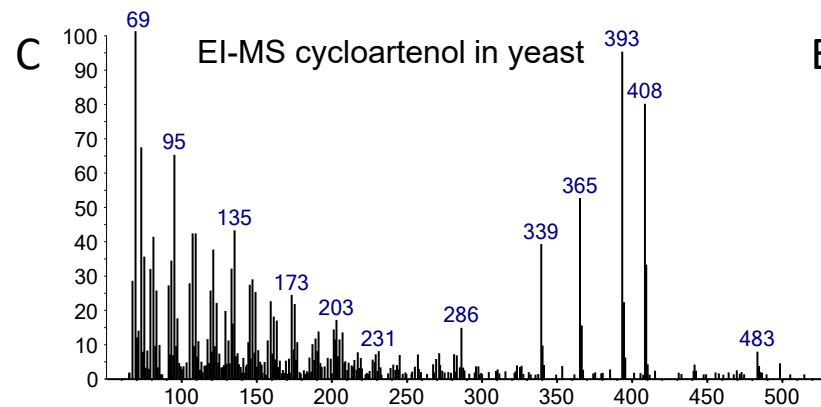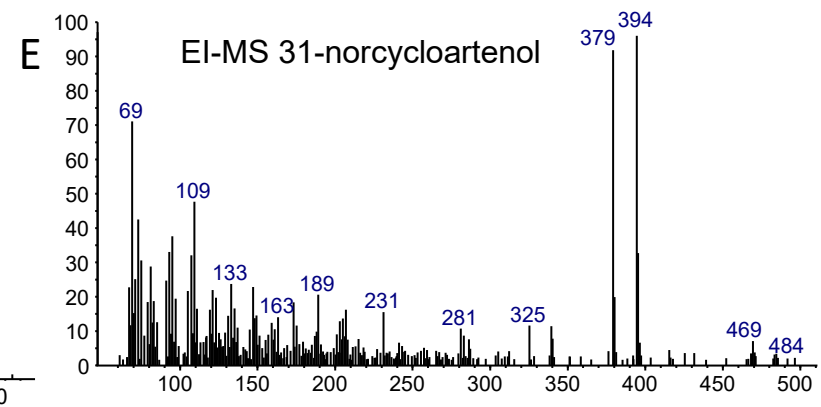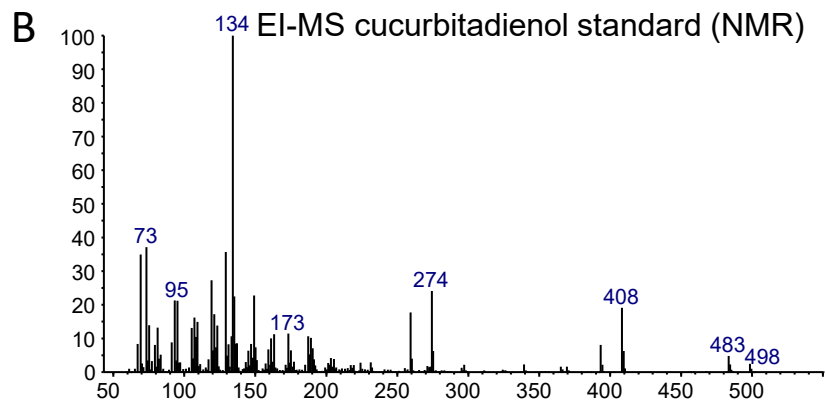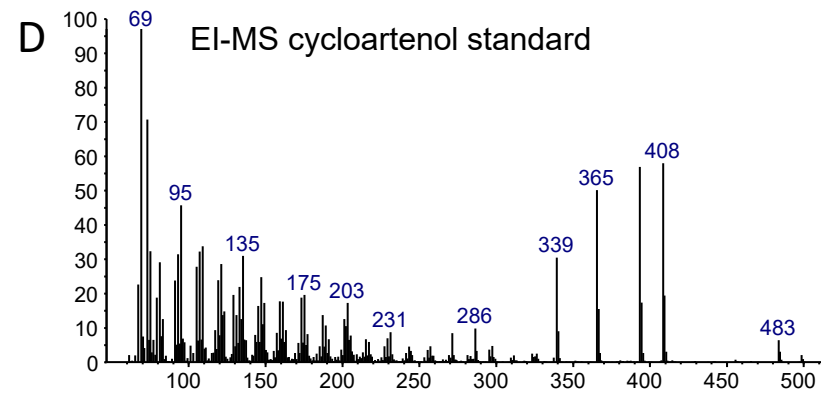

**Supplementary Figure 4** EI-MS fragmentation spectrum of trimethylsilylated cycloartenol, 31-norcycloartenol and cucurbitadienol. **(A)** EI-MS of the cucurbitadienol peak in extracts of spent medium from yeast expressing *laCPQ*. **(B)** EI-MS of a cucurbitadienol standard confirmed by NMR. **(C)** EI-MS of the cycloartenol peak in extracts of spent medium from yeast expressing with *laCAS*. **(D)** EI-MS of a cycloartenol standard. **(E)** EI-MS of the 31-norcycloartenol peak in extracts of spent medium from yeast expressing with *laCAS*.

A

|       | laCPQ | laCAS | CpCPQ | CpCAS | CsCPQ | CsCAS |
|-------|-------|-------|-------|-------|-------|-------|
| laCPQ | 100%  | 86%   | 68%   | 70%   | 68%   | 72%   |
| laCAS | 86%   | 100%  | 68%   | 73%   | 68%   | 74%   |
| CpCPQ | 68%   | 68%   | 100%  | 69%   | 89%   | 70%   |
| CpCAS | 70%   | 73%   | 69%   | 100%  | 69%   | 93%   |
| CsCPQ | 68%   | 68%   | 89%   | 69%   | 100%  | 70%   |
| CsCAS | 72%   | 74%   | 70%   | 93%   | 70%   | 100%  |

B

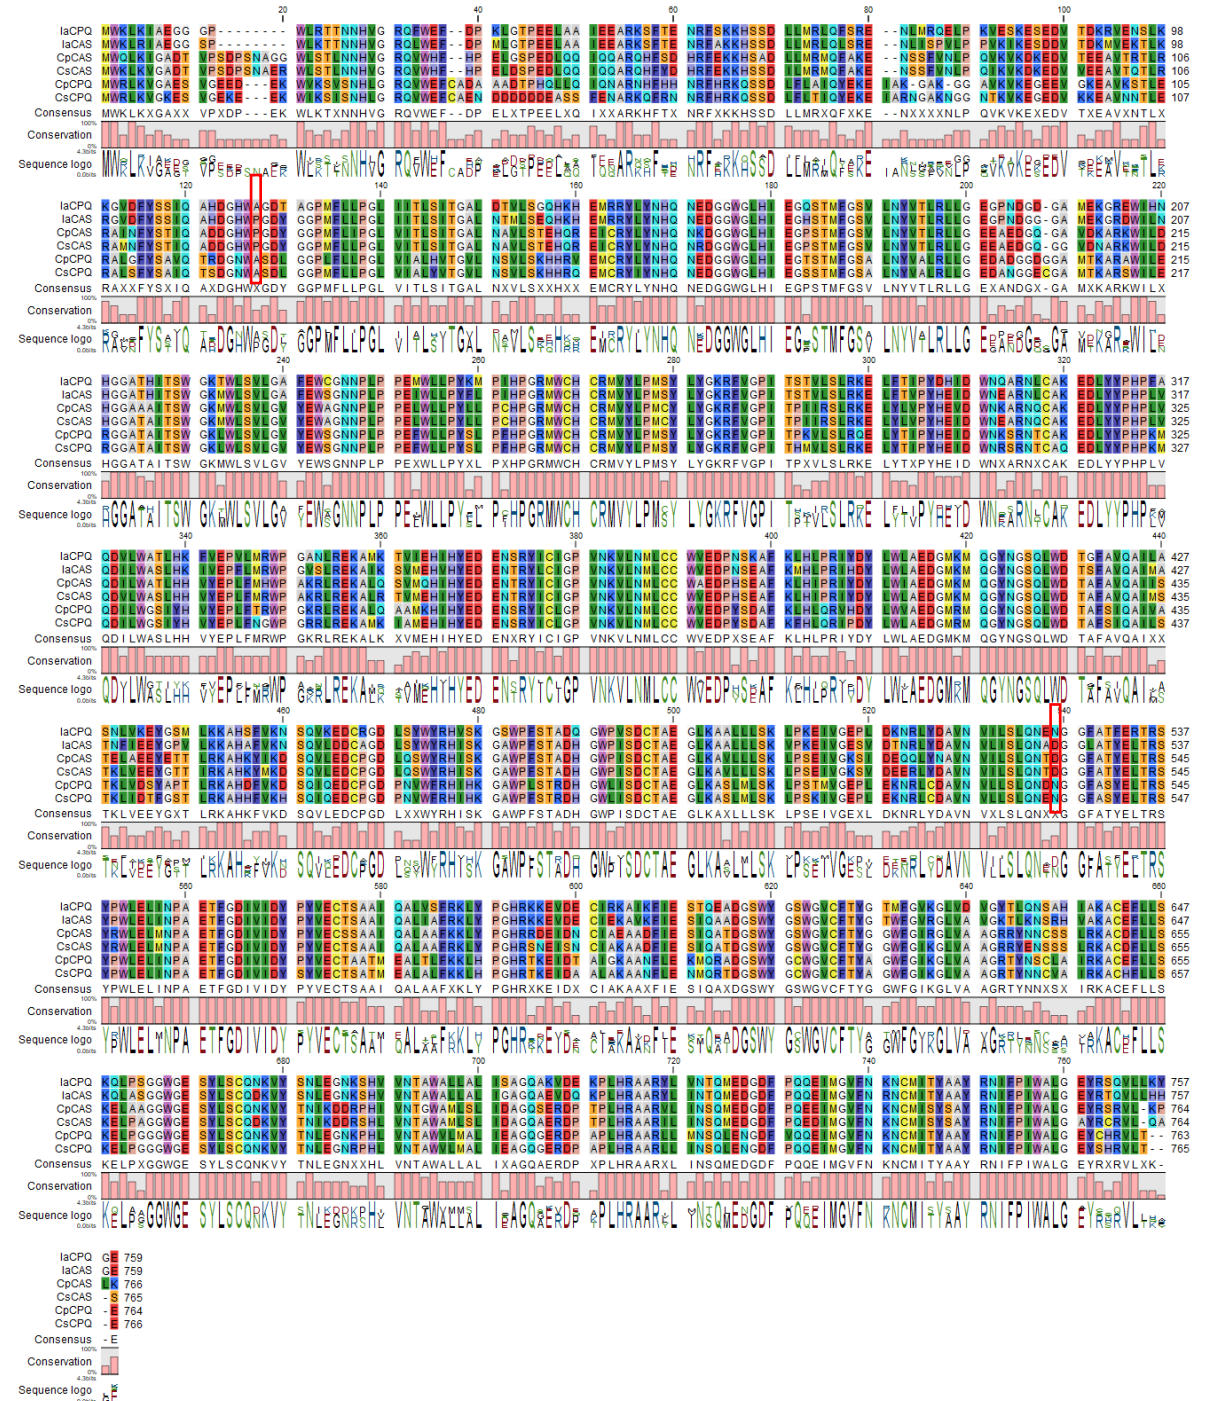

Supplementary Figure 5 Amino acid sequences % identity matrix (A) and alignment (B) between cucurbitadienol synthases (CPQs) and cycloartenol synthases (CASs) from *I. amara*, *C. pepo* and *C. sativus*.

Red boxes indicate the amino acids different between CPQs and CASs.

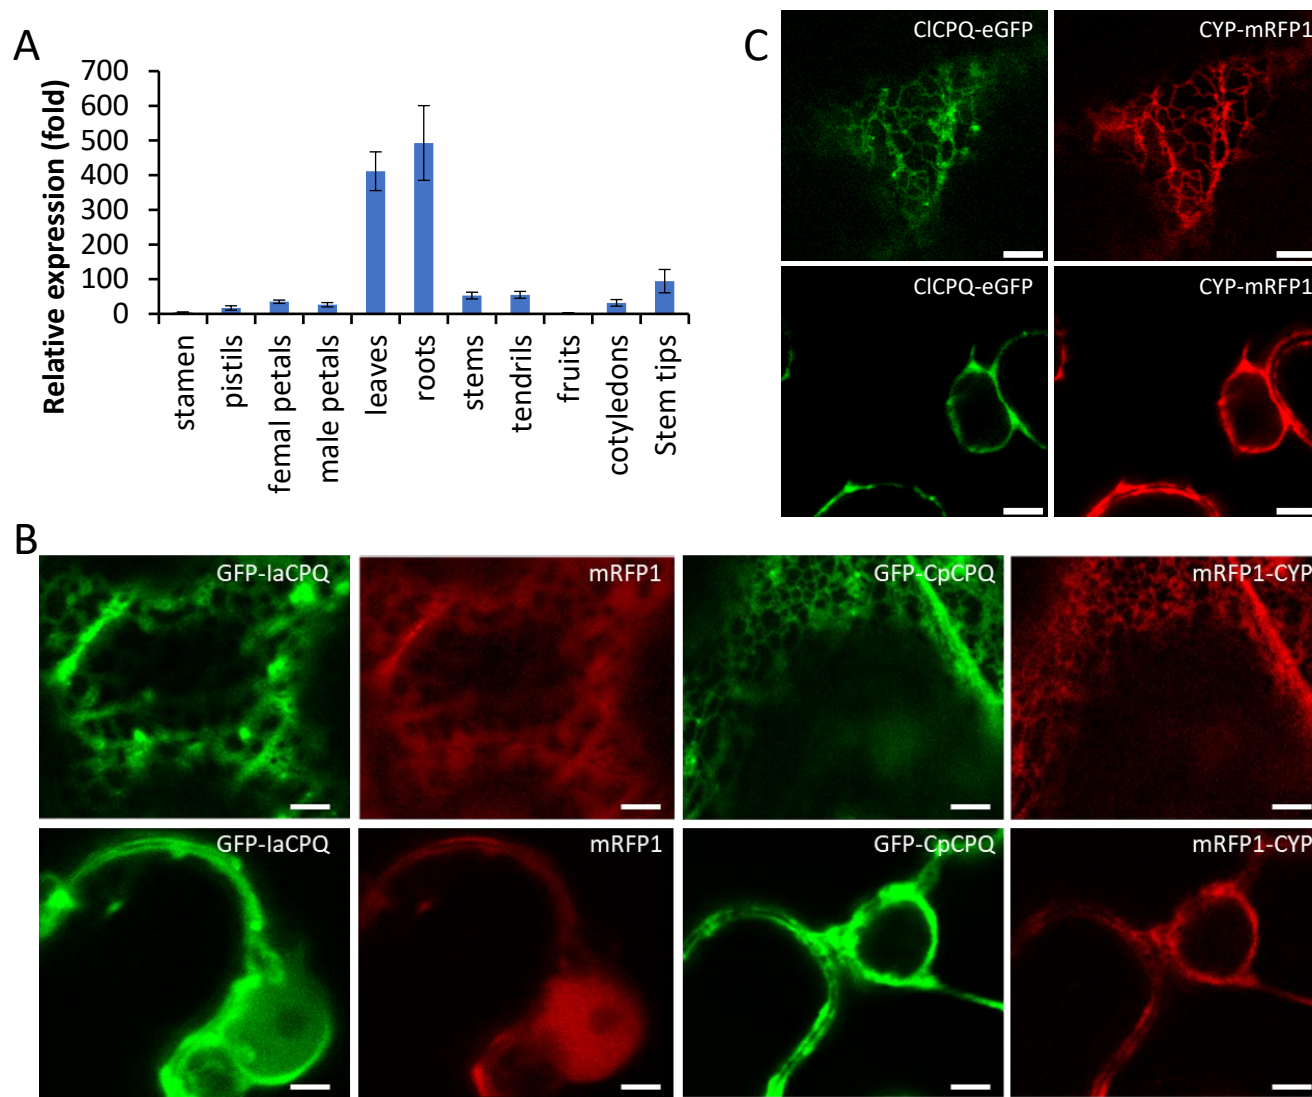

**Supplementary Figure 6 Organ-specific expression pattern of *C. lanatus* cucurbitadienol synthase and its subcellular localization to the ER. (A)** Relative expression of *CICPQ* in different *C. lanatus* organs quantified by qPCR. **(B)** Representative confocal images of the epidermal cell space and the nucleus of *N. benthamiana* leaves expressing N-terminally tagged proteins are shown. mRFP1 and CYP98A1 (P450) are used as controls for cytosolic and ER localization, respectively. Soluble mRFP1 is found in the nucleus and fills in gaps between plant cell compartments. ER-localized proteins (CpCPQ and CYP98A1) are restricted to nuclear membranes and a well-defined ER membrane network. Scale bars = 10  $\mu$ m. **(C)** Representative confocal images of the epidermal cell space and the nucleus of *N. benthamiana* leaves expressing C-terminally tagged proteins are shown. ER-localized CYP98A1 (P450) is used as a control. CICPQ is restrained to nuclear membranes and the ER membrane network. Scale bars = 10  $\mu$ m.

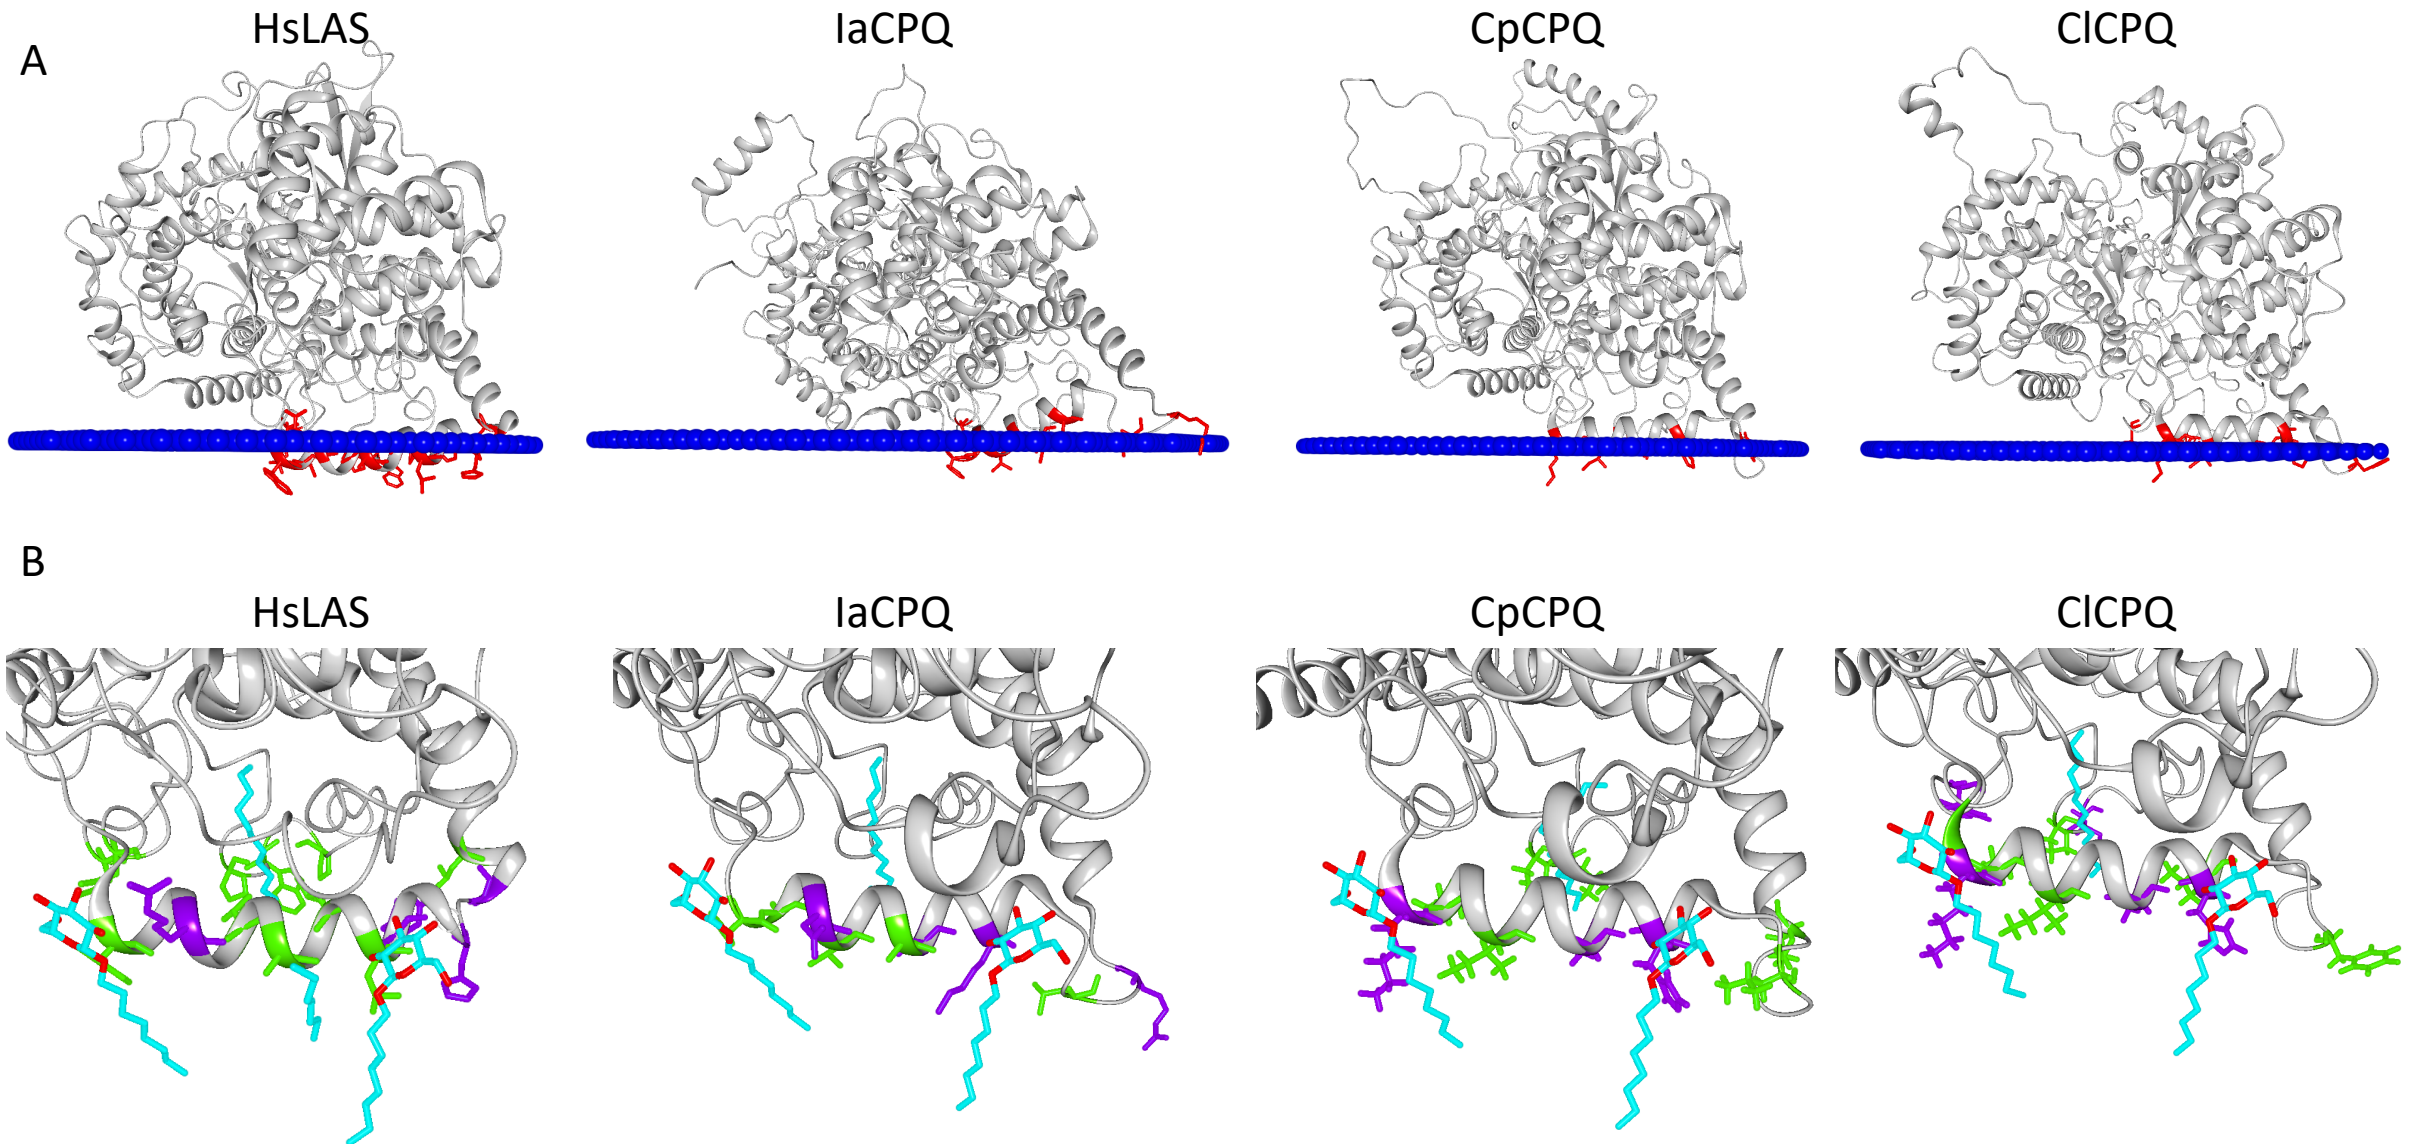

**Supplementary Figure 7 Homology modeling of OSCs and membrane interaction analysis using Positioning of Proteins in Membrane server.**

**(A)** The structure of LAS (PDB:1W6J) and homology models of IaCPQ, CpCPQ, and ClCPQ and the interaction with an empirical membrane (blue).

Amino acid residues which interact with the membrane are marked in red. **(B)** The amino acid residues of membrane inserting sites of LAS, IaCPQ, CpCPQ, and ClCPQ are marked in green (hydrophobic) and purple (polar), and interact with fragments of lipids (cyan).



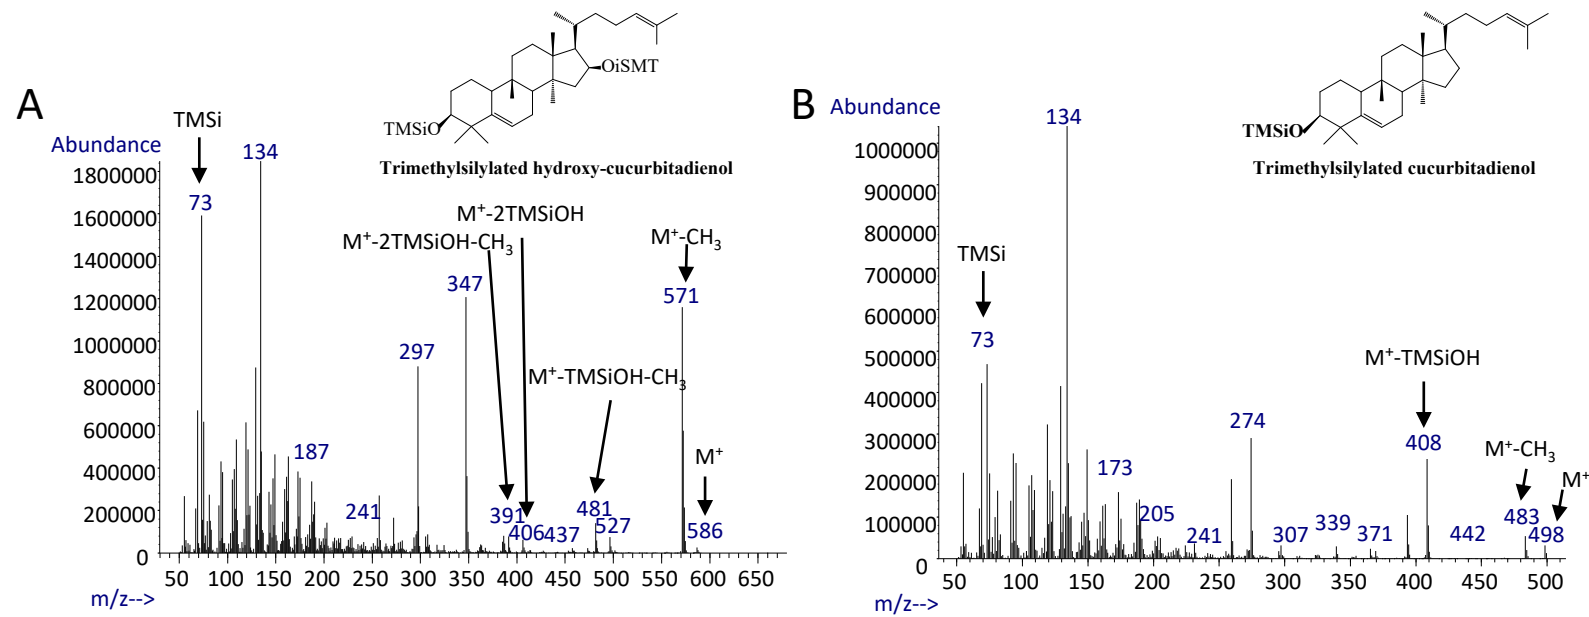

**Supplementary Figure 8** EI-MS fragmentation patterns of trimethylsilylated 16 $\beta$ -hydroxy-cucurbitadienol and cucurbitadienol. **(A)** 16 $\beta$ -hydroxy-cucurbitadienol peak in *N. benthamiana* leaves coexpressing *laCPQ* and *CYP708A16*. **(B)** Cucurbitadienol peak in *N. benthamiana* leaves expressing *laCPQ*. M<sup>+</sup>, parent ion; TMSi, trimethylsilyl group; TMSiOH, trimethylsilanol. 2TMSiOH, two trimethylsilanol groups.

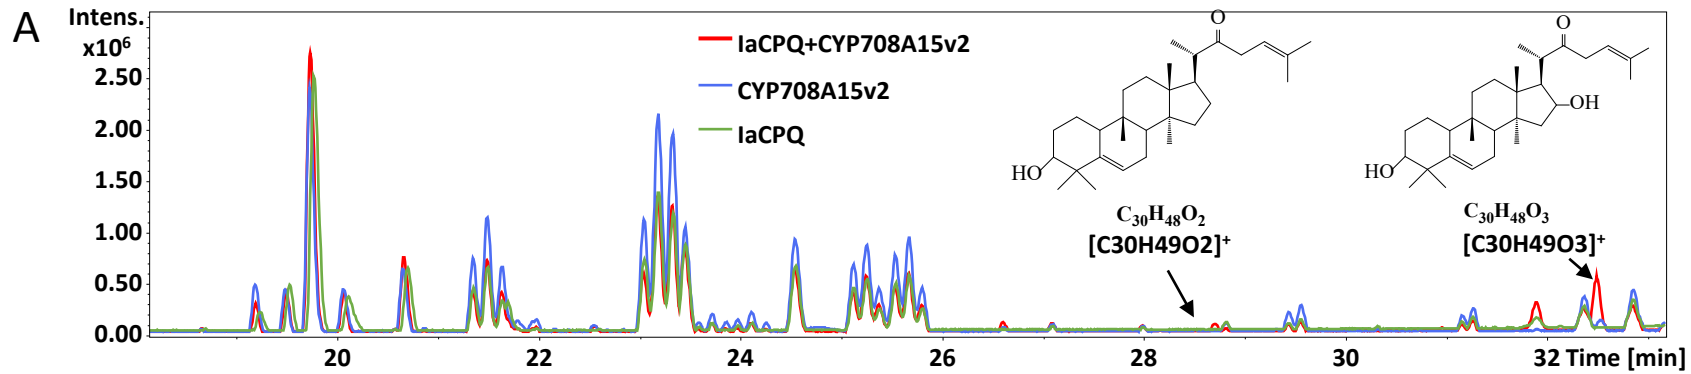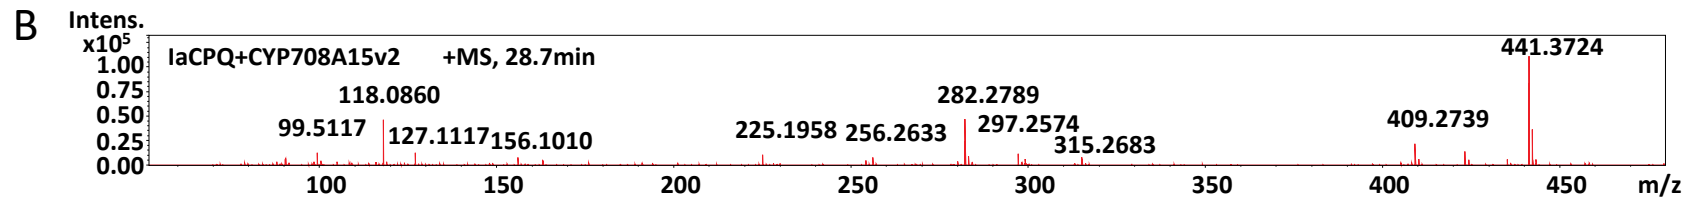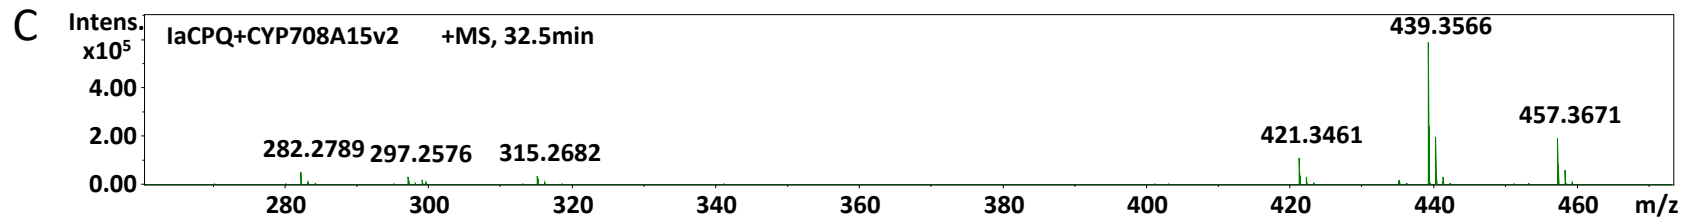

**Supplementary Figure 9** LC-MS chromatograms and spectrums of extracts from *N. benthamiana* leaves agro-infiltrated with vectors expressing *laCPQ*, *CYP708A15v2*, and *laCPQ+CYP708A15v2*. **(A)** LC-ESI-MS total ion chromatograms (TIC) indicating two new peaks in *N. benthamiana* leaves coexpressing *laCPQ+CYP708A15v2*, and their postulated structures and formulas based on the accurate masses. **(B)** MS spectrum of the first new peak at the retention time 28.7 min. **(C)** MS spectrum of the second new peak at the retention time 32.5 min.

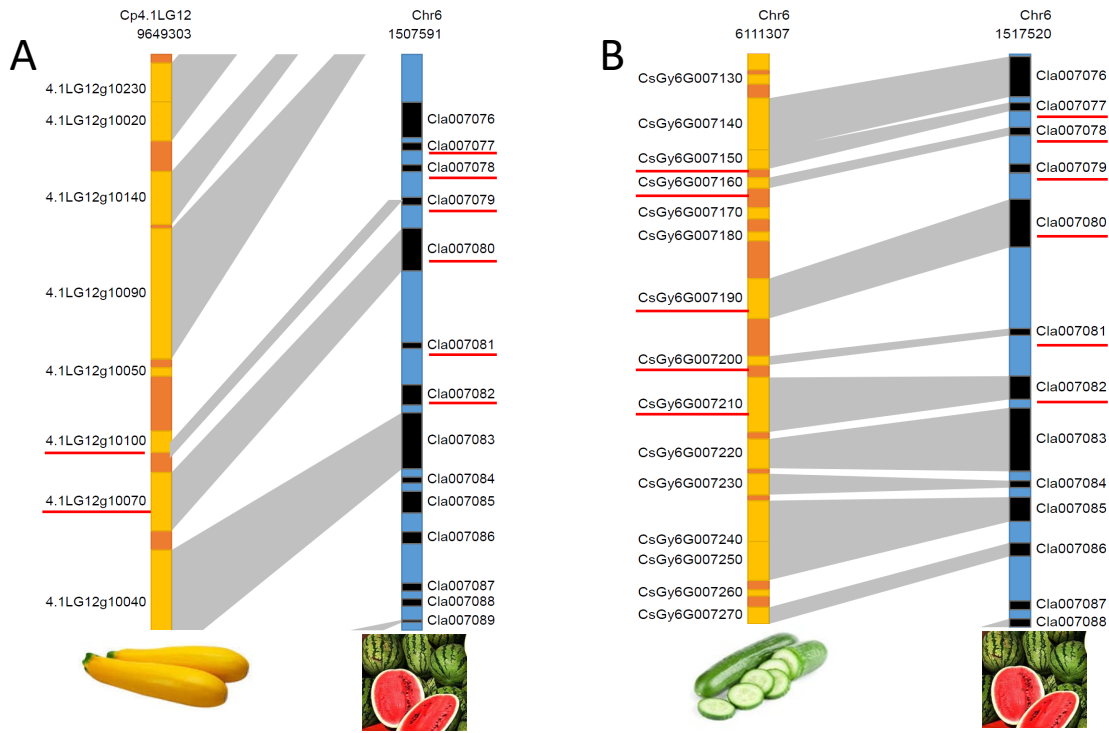

**Supplementary Figure 10 Genome localization between cucurbitacin biosynthetic genes in *I. amara* and cucurbitaceous species. (A)** Synteny between cucurbitacin biosynthetic gene clusters in *C. pepo* and *C. lanatus*. The proposed cucurbitacin biosynthetic genes are underlined with red lines (according to Zhou *et al.* (2016)).

**(B)** Synteny between cucurbitacin biosynthetic gene clusters in *C. sativus* and *C. lanatus*. The proposed cucurbitacin biosynthetic genes are underlined with red lines (according to Zhou *et al.* (2016)). **(C)** Genome localization of cucurbitacin biosynthetic genes in *I. amara* and selected the Cucurbitacea species. Data were mined from *I. amara* draft genome and the Cucurbit Genomics Database (CuGenDB).

| Brassicaceae             |                          | <i>Iberis amara</i> |                    |                | Cucurbitaceae            |                                         | <i>Cucurbita maxima</i> |     | <i>Cucurbita moschata</i> |     | <i>Cucurbita pepo</i> |     | <i>Lagenaria siceraria</i> |     | <i>Citrillus lanatus</i> |     | <i>Cucurmis melo</i> |     | <i>Cucurmis sativus</i> (Chinese long) |     | <i>Cucurmis sativus</i> (Gy14) |     |
|--------------------------|--------------------------|---------------------|--------------------|----------------|--------------------------|-----------------------------------------|-------------------------|-----|---------------------------|-----|-----------------------|-----|----------------------------|-----|--------------------------|-----|----------------------|-----|----------------------------------------|-----|--------------------------------|-----|
| Annotation               | Function                 | Gene ID             | Position           | Scaffold       | Annotation               | Function                                | Gene ID                 | Chr | Gene ID                   | Chr | Gene ID               | Chr | Gene ID                    | Chr | Gene ID                  | Chr | Gene ID              | Chr | Gene ID                                | Chr | Gene ID                        | Chr |
| CYP708A15                | C22-hydroxylation        | la138495_g9_i2      | 36455..40316 (-)   | scaffold 711   | CYP81                    | C25-hydroxylation                       | CmaCh08G000360          | 8   | CmoCh08G000370            | 8   | Cp4.1LG17g09460       | 17  | Lsi09G017880               | 9   | Cla007077                | 6   | MELO3C022377         | 11  | Csa6G088160                            | 6   | CsGy6G007150                   | 6   |
| CYP708A14                | Unknown                  | la570               | 133487..140620 (-) | scaffold 711   | CYP89                    | Unknown                                 | CmaCh17G013860          | 17  | CmoCh17G013390            | 17  | Unknown gene ID       | 12  | Lsi09G017870               | 9   | Cla007078                | 6   | MELO3C022376         | 11  | Csa6G088170                            | 6   | CsGy6G007160                   | 6   |
| Cucurbitadienol synthase | Cucurbitadienol synthase | la2462              | 85361...87211 (+)  | scaffold 16365 | CYP81                    | C2-hydroxylation                        | CmaCh17G013870          | 17  | CmoCh17G013400            | 17  | Cp4.1LG12g10100       | 12  | Lsi09G017850               | 9   | Cla007079                | 6   | MELO3C022375         | 11  | Csa6G088180                            | 6   | CsGy6G007170                   | 6   |
| CYP708A16                | C16-hydroxylation        |                     |                    |                | Cucurbitadienol synthase | Cucurbitadienol synthase                | CmaCh17G013880          | 17  | CmoCh17G013410            | 17  | Cp4.1LG12g10070       | 12  | Lsi09G017840               | 9   | Cla007080                | 6   | MELO3C022374         | 11  | Csa6G088690                            | 6   | CsGy6G007190                   | 6   |
|                          |                          |                     |                    |                | Acetyltransferase        | Acetyltransferase                       | CmaCh08G000350          | 8   | CmoCh08G000360            | 8   | Cp4.1LG17g09410       | 17  | Lsi09G017810               | 9   | Cla007081                | 6   | MELO3C022373         | 11  | Csa6G088700                            | 6   | CsGy6G007200                   | 6   |
|                          |                          |                     |                    |                | CYP87                    | Unknown                                 | CmaCh08G000340          | 8   | CmoCh08G000350            | 8   | Cp4.1LG17g09580       | 17  | Lsi09G017800               | 9   | Cla007082                | 6   | MELO3C022372         | 11  | Csa6G088710                            | 6   | CsGy6G007210                   | 6   |
|                          |                          |                     |                    |                | CYP87                    | C11-carboxylation and C20-hydroxylation |                         |     |                           |     |                       |     | Lsi02G002970               | 2   | Cla008354                | 1   |                      |     |                                        |     |                                |     |
|                          |                          |                     |                    |                | CYP87                    | C11-carboxylation and C20-hydroxylation | CmaCh18G001160          | 18  |                           |     | Cp4.1LG09g10760       | 9   | Lsi02G002970               | 2   | Cla008355                | 1   | MELO3C002192         |     | Csa1G044890                            | 1   | CsGy1G007640                   | 1   |
|                          |                          |                     |                    |                | CYP88                    | C19-hydroxylation                       |                         |     |                           |     |                       |     |                            |     |                          |     |                      |     | Csa3G903540                            | 3   | CsGy3G010130                   | 3   |

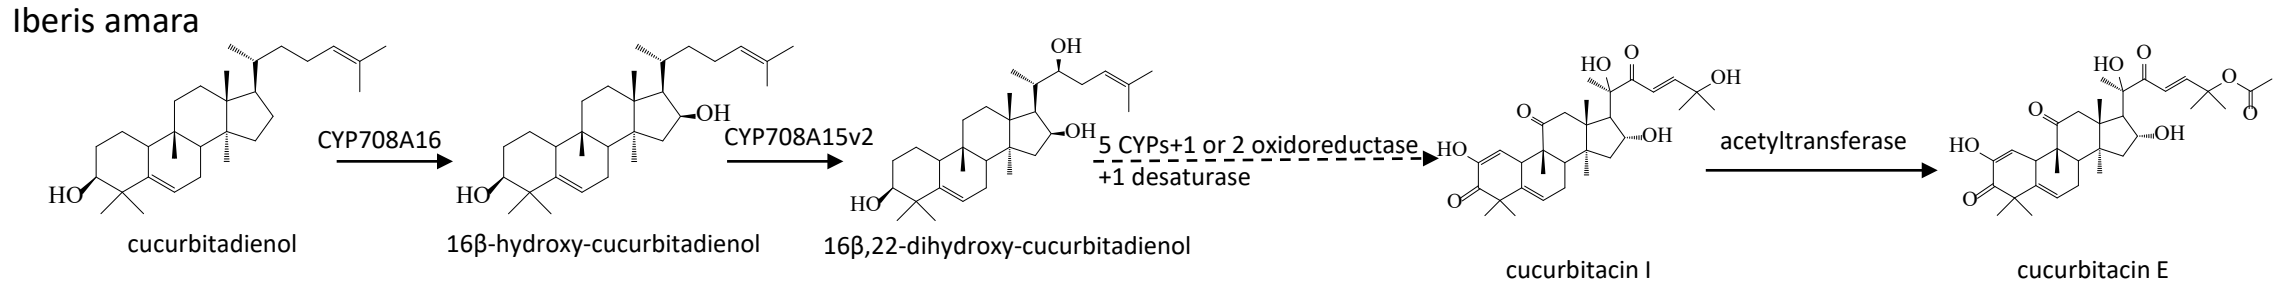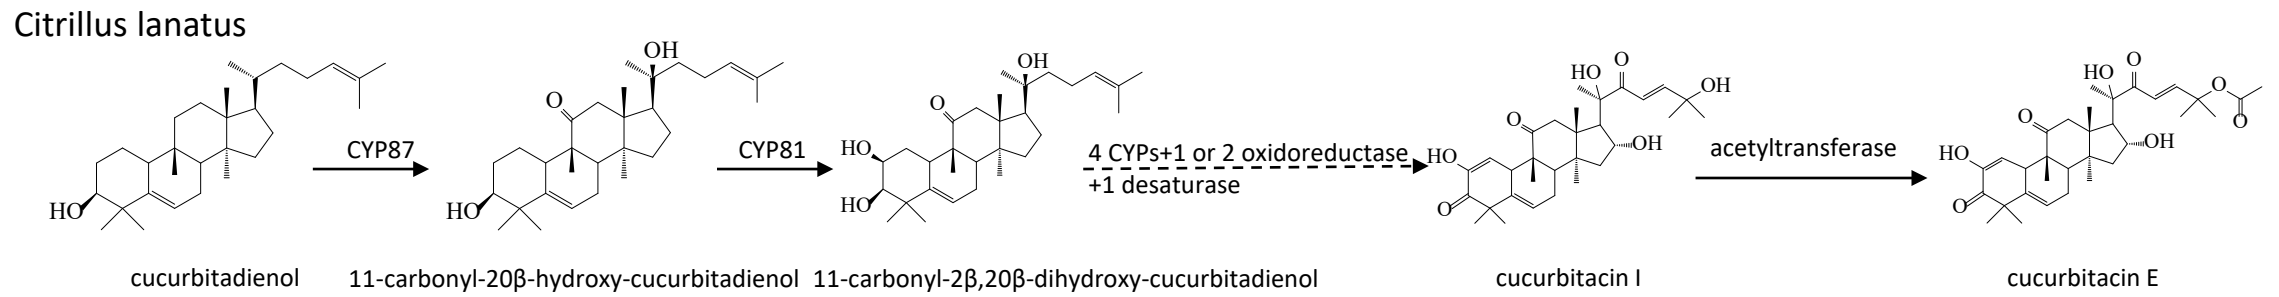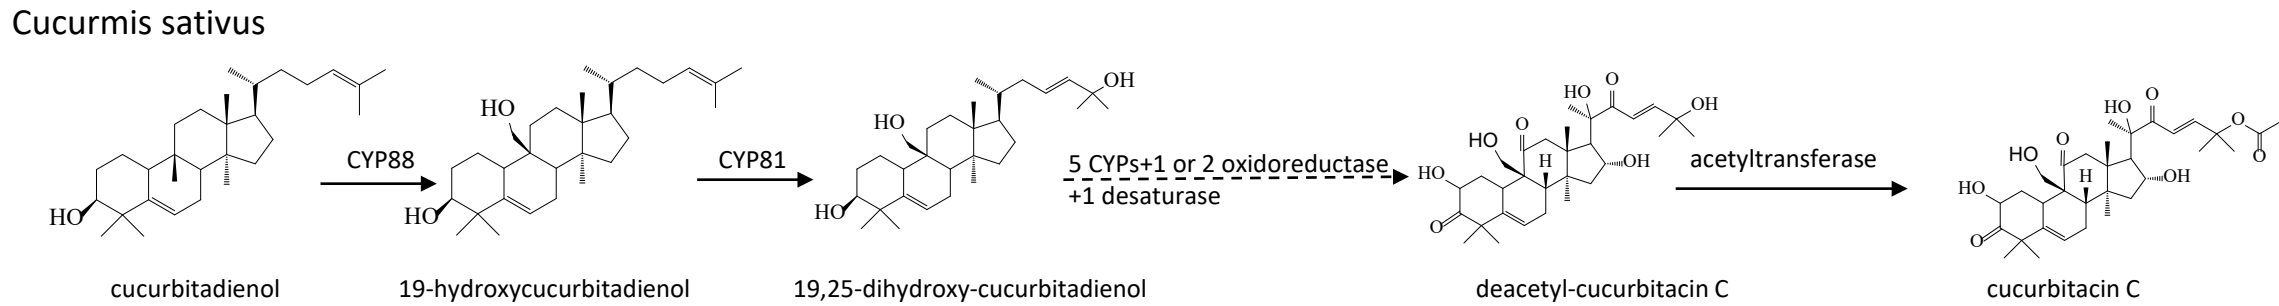

**Supplementary Figure 11 Proposed biosynthetic routes of cucurbitacin E in *I. amara* and *C. lanatus* and cucurbitacin C in *C. sativus***

**Supplementary Table 1 Miseq data assembling from leaves and roots**

| Contig measurement    | Leaf       | Root       |
|-----------------------|------------|------------|
| N75                   | 475        | 460        |
| N50                   | 850        | 852        |
| N25                   | 1,490      | 1,558      |
| Minimum contig length | 200        | 200        |
| Maximum contig length | 7,694      | 10,710     |
| Average contig length | 664        | 654        |
| Count                 | 43,548     | 60,975     |
| Total number of bases | 28,913,534 | 39,849,046 |

**Supplementary Table 2 Evaluation of one-ratio, free ratio, and two-ratio models using PAML for OSC genes**

$\omega$ , nonsynonymous/synonymous substitution rate ratios (dN/dS).

| Model            | Log likelihood | Number of parameters | $\omega$ value                                             |
|------------------|----------------|----------------------|------------------------------------------------------------|
| One-ratio model  | -75765.939912  | 133                  | 0.16574                                                    |
| Free-ratio model | -75449.905430  | 263                  | 0.05522                                                    |
| Two-ratio model  | -75760.995364  | 134                  | background (0.16480), laCPQ branch as foreground (0.28234) |

**Supplementary Table 3 Hiseq data assembling from roots, petals, and stems**

|                       |             |
|-----------------------|-------------|
| Total trinity contigs | 167,939     |
| Percent GC            | 41.11       |
| N90                   | 271         |
| N80                   | 383         |
| N70                   | 551         |
| N60                   | 776         |
| N50                   | 1,057       |
| N40                   | 1,374       |
| N30                   | 1,743       |
| N20                   | 2,206       |
| N10                   | 3,005       |
| Maximum contig length | 14,757      |
| Minimum contig length | 201         |
| Average contig length | 670         |
| Total assembled bases | 152,588,251 |

**Supplementary Table 4 P450 genes showed the same expression pattern as *laCPQ*, *CYP708A15v2*, and *CYP708A16* in the hierarchical cluster analysis**

| <b>Name</b>          | <b>Annotation</b> | <b>Root_FPKM</b> | <b>Petal_FPKM</b> | <b>Stem_FPKM</b> |
|----------------------|-------------------|------------------|-------------------|------------------|
| <b>c138495_g9_i2</b> | <b>CYP70815v2</b> | <b>289.77</b>    | <b>1042.14</b>    | <b>674.93</b>    |
| c138495_g8_i2        | CYP708A14         | 254.78           | 742.04            | 358.15           |
| c138495_g9_i1        | CYP70815v1        | 168.08           | 564.14            | 430.54           |
| <b>c143740_g2_i3</b> | <b>laCPQ</b>      | <b>19.34</b>     | <b>105.59</b>     | <b>96.64</b>     |
| c134847_g1_i1        | CYP91A2           | 19.27            | 57.76             | 42.36            |
| c141458_g2_i2        | CYP72A13          | 5.39             | 29.92             | 18.79            |
| c51282_g1_i1         | CYP708A2          | 0.19             | 26.67             | 25.99            |
| c141272_g2_i1        | CYP81D8           | 0.02             | 25.45             | 15.53            |
| c144136_g7_i2        | CYP90A1           | 3.4              | 18.61             | 9.05             |
| c143985_g4_i2        | CYP76C2           | 7.71             | 14.66             | 9.82             |
| c143285_g2_i1        | CYP86A8           | 3.81             | 12.65             | 11.85            |
| c138467_g1_i2        | CYP71B6           | 7.32             | 11.06             | 9.42             |
| c144174_g1_i3        | CYP71B7           | 7.36             | 10.07             | 9.62             |
| c144995_g2_i6        | CYP72A11          | 3.28             | 10.02             | 8.92             |
| c96586_g1_i1         | CYP96A9           | 0.01             | 8.2               | 3.41             |
| c142167_g2_i5        | CYP71B11          | 0.08             | 6.78              | 6.36             |
| c137075_g2_i1        | CYP72A14          | 1.24             | 6.68              | 2.61             |
| c110176_g2_i1        | CYP76C1           | 0.26             | 6.54              | 0.48             |
| c137636_g2_i7        | CYP718            | 0.28             | 6.25              | 5.52             |
| c117846_g1_i1        | CYP715A1          | 0.32             | 6.07              | 3.67             |
| c142167_g2_i3        | CYP71B11          | 0.18             | 5.36              | 3.85             |
| c142167_g2_i1        | CYP71B11          | 0.09             | 5.31              | 4.6              |
| c134323_g1_i6        | CYP97B3           | 1.76             | 3.74              | 3.66             |
| c137371_g2_i5        | CYP708A3          | 0.78             | 1.55              | 1.39             |
| c137371_g2_i2        | CYP708A2          | 0.68             | 1.5               | 1.15             |
| c137371_g2_i1        | CYP708A3          | 0.6              | 1.34              | 1.33             |
| c129976_g2_i1        | CYP78A5           | 0.29             | 1.2               | 0.33             |
| c88613_g1_i1         | CYP710A1          | 0.03             | 1.14              | 0.71             |
| <b>c97057_g1_i1</b>  | <b>CYP708A16</b>  | <b>0.07</b>      | <b>0.84</b>       | <b>0.69</b>      |
| c139206_g1_i6        | CYP81K1           | 0.48             | 0.72              | 0.68             |
| c123163_g1_i2        | CYP82G1           | 0.05             | 0.51              | 0.46             |
| c139206_g1_i1        | CYP81K1           | 0.28             | 0.46              | 0.33             |
| c140397_g1_i4        | CYP75B1           | 0.08             | 0.28              | 0.14             |

**Supplementary Table 5 P450 gene/contig numbers comparison between *Arabidopsis thaliana* and *I. amara*.** Subfamilies with expanded P450 members from *I. amara* compare to *A. thaliana* were highlighted with different colours corresponding to Figure 6B. Subfamilies containing P450s catalyzing triterpenoids reported in other literatures were labeled with red colour.

| Sub Family | Gene/contig number comparison |                     |
|------------|-------------------------------|---------------------|
|            | <i>Arabidopsis thaliana</i>   | <i>Iberis amara</i> |
| CYP71B     | 37                            | 36                  |
| CYP72A     | 9                             | 26                  |
| CYP705A    | 31                            | 25                  |
| CYP708A    | 4                             | 17                  |
| CYP81D     | 8                             | 16                  |
| CYP96A     | 14                            | 11                  |
| CYP707A    | 4                             | 10                  |
| CYP76C     | 8                             | 10                  |
| CYP706A    | 7                             | 9                   |
| CYP71A     | 17                            | 9                   |
| CYP78A     | 6                             | 9                   |
| CYP86A     | 8                             | 8                   |
| CYP709B    | 3                             | 6                   |
| CYP712A    | 2                             | 5                   |
| CYP77A     | 5                             | 5                   |
| CYP79B     | 3                             | 5                   |
| CYP710A    | 4                             | 4                   |
| CYP86C     | 4                             | 4                   |
| CYP714A    | 2                             | 3                   |
| CYP715A    | 1                             | 3                   |
| CYP75B     | 1                             | 3                   |
| CYP81F     | 4                             | 3                   |
| CYP82G     | 1                             | 3                   |
| CYP98A     | 3                             | 3                   |
| CYP702A    | 8                             | 2                   |
| CYP703A    | 1                             | 2                   |
| CYP721A    | 1                             | 2                   |
| CYP735A    | 2                             | 2                   |
| CYP81K     | 2                             | 2                   |
| CYP83B     | 1                             | 2                   |
| CYP84A     | 1                             | 2                   |
| CYP86B     | 1                             | 2                   |
| CYP89A     | 8                             | 2                   |
| CYP51G     | 2                             | 1                   |
| CYP701A    | 1                             | 1                   |
| CYP704A    | 2                             | 1                   |
| CYP704B    | 1                             | 1                   |
| CYP711A    | 1                             | 1                   |
| CYP718     | 1                             | 1                   |
| CYP720A    | 1                             | 1                   |

|         |   |   |
|---------|---|---|
| CYP722A | 1 | 1 |
| CYP734A | 1 | 1 |
| CYP72C  | 1 | 1 |
| CYP73A  | 1 | 1 |
| CYP74A  | 1 | 1 |
| CYP74B  | 1 | 1 |
| CYP76G  | 1 | 1 |
| CYP77B  | 1 | 1 |
| CYP79A  | 3 | 1 |
| CYP79F  | 2 | 1 |
| CYP81H  | 1 | 1 |
| CYP82C  | 3 | 1 |
| CYP82F  | 1 | 1 |
| CYP83A  | 1 | 1 |
| CYP85A  | 1 | 1 |
| CYP87A  | 1 | 1 |
| CYP88A  | 2 | 1 |
| CYP90A  | 1 | 1 |
| CYP90B  | 1 | 1 |
| CYP90C  | 1 | 1 |
| CYP90D  | 1 | 1 |
| CYP93D  | 1 | 1 |
| CYP94B  | 3 | 1 |
| CYP94C  | 1 | 1 |
| CYP94D  | 2 | 1 |
| CYP97A  | 1 | 1 |
| CYP97B  | 1 | 1 |
| CYP97C  | 1 | 1 |
| CYP716A | 2 | 0 |
| CYP724A | 1 | 0 |
| CYP79C  | 5 | 0 |
| CYP81G  | 1 | 0 |

---



**Supplementary Table 6 Primer sequences used in this study**

| <b>Name</b>       | <b>Primer Sequence</b>                                       | <b>Purpose</b>                                                           |
|-------------------|--------------------------------------------------------------|--------------------------------------------------------------------------|
| laCAS-userF       | GGCTTAAXATGTGGAAACTGAGAATCGCC                                | Cloning, <i>N.benthamiana</i><br>expression, subcellular<br>localization |
| laCAS-userR       | GGTTAAXTCATTCCCCATGGTGCAATAA                                 | Cloning, <i>N.benthamiana</i><br>expression, subcellular<br>localization |
| laCPQ-userF       | GGCTTAAXATGTGGAAACTGAAAATCGC                                 | Cloning, <i>N.benthamiana</i><br>expression, subcellular<br>localization |
| laCPQ-userR       | GGTTAAXTTATTCTCCATATTTCAATAAAACCTG                           | Cloning, <i>N.benthamiana</i><br>expression, subcellular<br>localization |
| laOSC3-userF      | GGCTTAAXATGTGGAGGCTAAGGATTGGAG                               | Cloning                                                                  |
| laOSC3-userR      | GGTTAAXTTACATAAGTAAACGCATGGCTTTAG                            | Cloning                                                                  |
| laOSC4-userF      | GGCTTAAXATGTGGAGGCTGAAGATCGGAGC                              | Cloning                                                                  |
| laOSC4-userR      | GGTTAAXTCAGAGCATGCGCAAAGCCTTGG                               | Cloning                                                                  |
| laOSC5-userF      | GGCTTAAXATGTGGAAACTGAAGATAGGAG                               | Cloning                                                                  |
| laOSC5-userR      | GGTTAAXCTATAGATGATGTTGATCTGTTG                               | Cloning                                                                  |
| laOSC1-pdnorF     | GGGGACAAGTTTGTACAAAAAAGCAGGCTCCAT<br>GTGGAAACTGAGAATCGCC     | Yeast expression                                                         |
| laOSC1-pdnorR     | GGGGACCACTTTGTACAAGAAAGCTGGGTTTCAT<br>TCCCCATGGTGCAATAA      | Yeast expression                                                         |
| laOSC2-pdnorF     | GGGGACAAGTTTGTACAAAAAAGCAGGCTCCAT<br>GTGGAAACTGAAAATCGC      | Yeast expression                                                         |
| laOSC2-pdnorR     | GGGGACCACTTTGTACAAGAAAGCTGGGTTTATT<br>CTCCATATTTCAATAAAACCTG | Yeast expression                                                         |
| CICPQ-userR-stop  | GGTTAAXCCATCAGTCAAAACCCGATGGA                                | Subcellular localization                                                 |
| CpCPQ-userR-stop  | GGTTAAXCCTTCAGTAAGAACCCGATG                                  | Subcellular localization                                                 |
| laOSC2-userR-stop | GGTTAAXCCTTCTCCATATTTCAATAAAACCTG                            | Subcellular localization                                                 |
| laactin-qpcrF     | GGACATCCAACCCCTTGCT                                          | qPCR                                                                     |
| laactin-qpcrR     | CCATCCAACCATGACACCA                                          | qPCR                                                                     |
| laCPQ-qpcrF       | CAAATTGCACCTACCCCGGA                                         | qPCR                                                                     |
| laCPQ-qpcrR       | CCCACGGCAATCCTCTTTCA                                         | qPCR                                                                     |
| Clactin-qpcrF     | AGCTGCAGGAATCCACGAAA                                         | qPCR                                                                     |
| Clactin-qpcrR     | GTGGCGCAACGACCTTAATC                                         | qPCR                                                                     |
| CICPQ-qpcrF       | TGGAAAACGGCTGAGGGAAA                                         | qPCR                                                                     |
| CICPQ-qpcrR       | TAGTCGGGGACACGTTGAAG                                         | qPCR                                                                     |

## Supplementary NMR data

### General experimental procedures

NMR experiments were performed at 300 K using a 600 MHz Bruker Avance III instrument (operating frequency of 600.13 MHz) equipped with a Bruker SampleJet sample changer and a 5-mm room temperature BBI probe head with z-gradient and automated tuning and matching (Bruker Biospin, Rheinstetten, Germany). Approximately 1 mg sample was dissolved in methanol-*d*<sub>4</sub>, and the acquired data were calibrated according to the residual solvent peak at  $\delta$  3.31 for <sup>1</sup>H and  $\delta$  49.01 ppm for <sup>13</sup>C. All pulse programs were from Bruker's standard experiment library, and 1D <sup>1</sup>H spectra were acquired with 30°-pulses, 1.5 s relaxation delay, 20 ppm spectral width, and 64k data points. 2D homonuclear experiments were acquired with 10 ppm spectral width and 8k (COSY) or 2k (NOESY/ROESY) data points in the direct dimension, collecting 256 FIDs for the indirect dimension. 2D heteronuclear experiments were acquired with 10 ppm spectral width and 8k (HSQC) or 4k (HMBC) data points in the direct dimension, collecting 256 (multiplicity edited HSQC) or 512 (HMBC) FIDs for a spectral width of 240 ppm in the indirect dimension. The HSQC experiments were optimized for <sup>1</sup>J<sub>C,H</sub> = 145Hz and HMBC experiments were optimized for optimized for <sup>n</sup>J<sub>C,H</sub> = 8Hz. Automated tuning and matching, optimization of lock parameters, gradient shimming, setting of receiver gain, and acquisition of NMR data were performed using topspin 3.5 (Bruker Biospin, Rheinstetten, Germany). Before measurement, each sample was pre-heated at 300 K for 60 s and kept for 5 min inside the NMR probe head to reach temperature equilibrium of 300±1 K.

### Compound 1: 16β,22-dihydroxycucurbitadienol

Approximately 1 mg of compound **1** was dissolved in 650 μl methanol-*d*<sub>4</sub>, and 1D <sup>1</sup>H and 2D COSY, HSQC, HMBC, and ROESY NMR spectra were acquired as described above. The <sup>1</sup>H NMR spectrum showed five methyl singlets at  $\delta$  0.89 (H-30), 0.95 (H-19), 1.01 (H-28), 1.09 (H-18), and 1.11 (H-29), a methyl doublet at  $\delta$  0.95 (3H, d, 6.6 Hz, H-21), two signals for double bond-bound methyl groups at  $\delta$  1.63 (H-27) and 1.70 (H-26), two olefinic signals at  $\delta$  5.54 (1H, m, H-6) and 5.25 (1H, br t, 7.1 Hz, H-24), and a downfield shifted methine triplet at  $\delta$  3.44 (1H, br t, 2.7 Hz, H-3), which indicated the presence of a cucurbitadienol core skeleton (Shang, et al. 2014). However, with the three oxygen according to the molecular formula and two downfield shifted methine signals at  $\delta$  4.42 (1H, td, 7.6, 5.8 Hz, H-16) and 3.76 (1H, ddd, 7.3, 6.3, 1.5 Hz, H-22) indicated two additional hydroxyl groups in compound **1**. Analysis of the COSY spectrum led to identification of the CHO(3)-CH<sub>2</sub>(2)-CH<sub>2</sub>(1)-CH(10), CH(6)-CH<sub>2</sub>(7)-CH(8), CH<sub>2</sub>(11)-CH<sub>2</sub>(12), and CH<sub>2</sub>(15)-CHO(16)-CH(17)-CH(20)(CH<sub>3</sub>(21))-CHO(22)-CH<sub>2</sub>(23)-CH(24)(CH<sub>3</sub>(26))-CH<sub>3</sub>(27) spin systems indicated with blue in Supplementary Figure 12A. These spin systems, the remaining methyl groups, and quaternary carbon atoms C-4, C-5, C-9, C-13, C-14 and C-25 were assembled based on HMBC correlations, of which selected are shown in Supplementary Figure 12B. In the ROESY spectrum, a network of correlations between H-19 ↔ H-8 ↔ H-18 ↔ H-15β showed these to be β-positioned (above the plane of the core skeleton) as seen in Supplementary Figure 12C. Similarly, network of correlations between H-3 ↔ H-28 ↔ H-10 ↔ H-30 ↔ H-15α ↔ H-16 ↔ H-17 ↔ H-30 showed these to be α-positioned (below the plane of the core skeleton) as seen in Supplementary Figure 12D. The pseudo-equatorial α-position of H-3 (as seen from the above-mentioned ROEs and the triplet structure arising from pseudo-equatorial to pseudo-equatorial and pseudo-equatorial to pseudo-axial couplings of 2.7 Hz (Supplementary Table 7)) leads to a β-positioned (pseudo-axial) 3-hydroxyl group, as also reported for cucurbitadienol (Shang, et al. 2014) and related analogs (Itkin, et al. 2016).

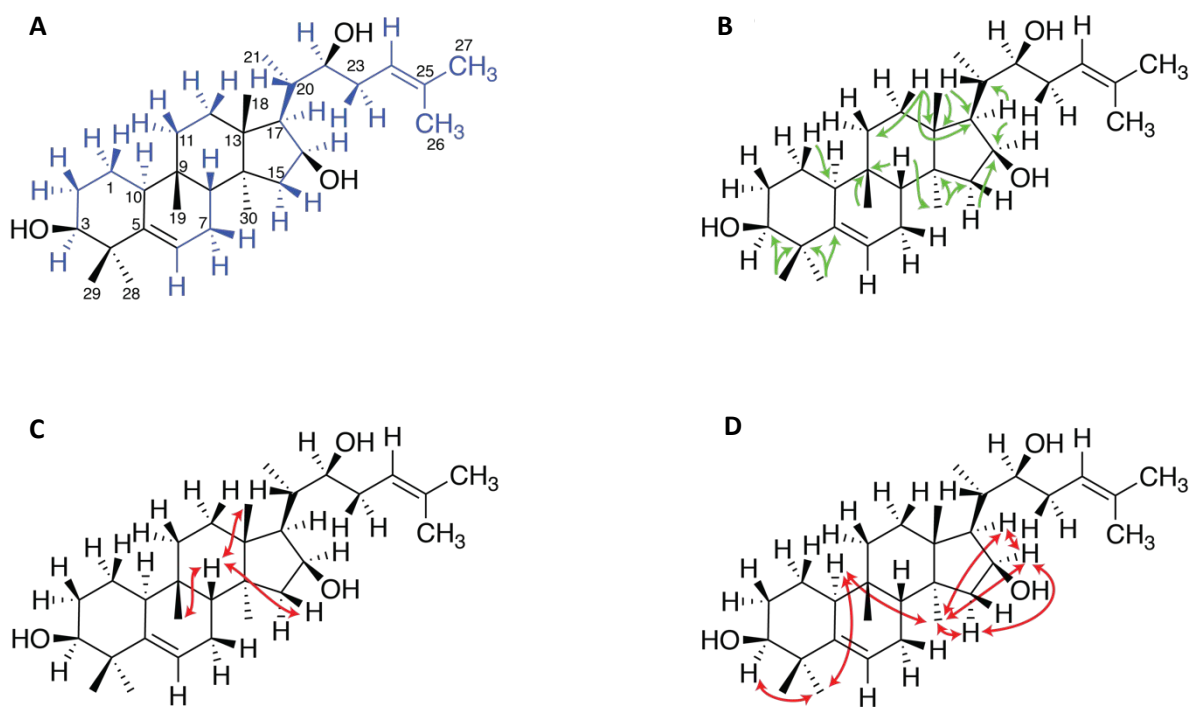

Supplementary Figure 12 **(A)** Structure and numbering of 16 $\beta$ ,22-dihydroxycucurbitadienol with correlations found in the COSY spectrum indicated in blue. **(B)** Selected HMBC correlations used for structure elucidation with  $^nJ_{C,H}$  optimized for 8 Hz (arrows pointing from H to C). **(C)** Correlations from the ROESY spectrum used to identify  $\beta$ -oriented protons, i.e., pointing up, starting with H-19 as the anchoring point. **(D)** Correlations from the ROESY spectrum used to identify  $\alpha$ -oriented protons, i.e., pointing down, starting with H-3 as the anchoring point.

Whereas cucurbitacin C and its deacetyl analog has been reported to have an  $\alpha$ -positioned hydroxyl group at C-16 (Shang, et al. 2014), compound **1** has a  $\beta$ -positioned hydroxyl group at C-16. This is seen from the above-mentioned ROEs from H-30, H-15 $\alpha$  and H17 to H-16, where especially the ROE between the 1,3-pseudodiaxial H-30 and H-16 would not have been observed with an  $\alpha$ -positioned hydroxyl at C-16. Furthermore, the coupling pattern of H-16 (td, 7.6, 5.8 Hz) supports the  $\beta$ -orientation of the proton and the  $\alpha$ -orientation of the hydroxyl group at C-16. Thus, after initial energy minimization of compound **1** using MM2 force field, ten repeated cycles of MM2 molecular dynamics followed by MM2 energy minimization in Chem3D ver. 18.1 (PerkinElmer, Waltham, MA, USA), lead to convergence of minimum energy conformations, of which the last is shown in Supplementary Figure 13A. The following dihedral angles were found for the ten minimization cycles: H16-C16-C17-H17 =  $27.6 \pm 0.1^\circ$ , H15 $\alpha$ -C15-C16-H16 =  $16.7 \pm 0.1^\circ$ , and H15 $\beta$ -C15-C16-H16 =  $135.0 \pm 0.1^\circ$ . For its 16-epimer, where the minimum energy conformation is shown in Supplementary Figure 13B, the following dihedral angles were measured: H16-C16-C17-H17 =  $147.5 \pm 0.7^\circ$ , H15 $\alpha$ -C15-C16-H16 =  $-100.6 \pm 0.7^\circ$ , and H15 $\beta$ -C15-C16-H16 =  $17.3 \pm 0.7^\circ$ . These dihedral angles were used for calculating coupling constants according to the Karplus equation using SweetJ version 4.2 desktop calculator (Balacco 1996) ([www.inmr.net/sweetj.html](http://www.inmr.net/sweetj.html)), which resulted in  $^3J_{H16,H17} = ^3J_{H15\beta,H16} = 7.4$  Hz and  $^3J_{H15\alpha,H16} = 6.8$  Hz for compound **1** ( $\beta$ -positioned hydroxyl group), whereas the calculations resulted in  $^3J_{H16,H17} = 7.2$  Hz,  $^3J_{H15\beta,H16} = 7.4$  Hz, and  $^3J_{H15\alpha,H16} = 1.9$  Hz for its 16-epimer ( $\alpha$ -positioned hydroxyl group). Thus, the triplet of doublet pattern with coupling constants of 7.6 and 5.8 Hz observed for H-16 in the  $^1H$  NMR spectrum of **1** is in relative good agreement with the theoretical triplet of doublet pattern with 7.4 and 5.8 Hz calculated for a  $\beta$ -positioned

hydroxyl group at C-16 - whereas the theoretical doublet of doublet of doublet pattern with coupling constants of 7.4, 7.2, and 1.9 Hz for its 16-epimer is far from the observed coupling pattern. Thus, the 16-hydroxyl group of **1** is in  $\beta$ -position.

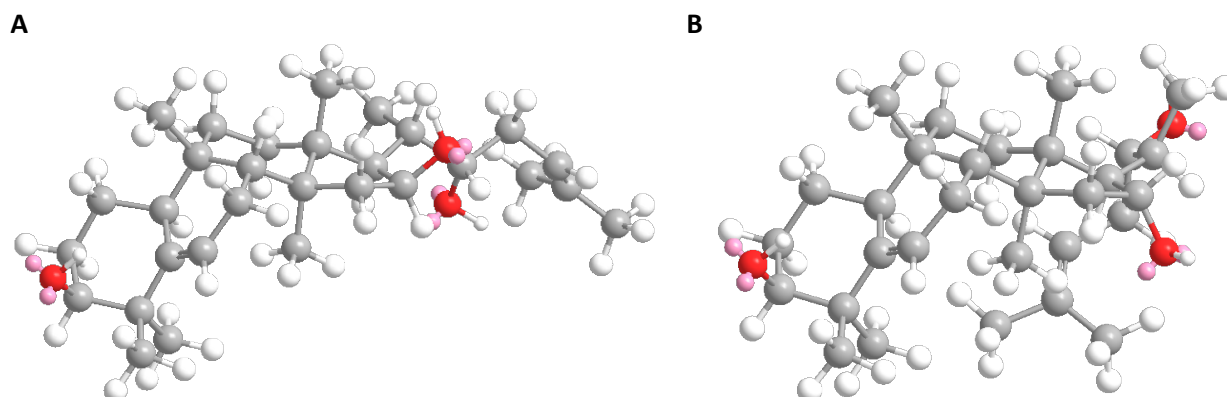

**Supplementary Figure 13** Minimum energy conformations after initial energy minimization of compound **1** using MM2 force field, ten repeated cycles of MM2 molecular dynamics followed by MM2 energy minimization. (A) Compound **1** (16 $\beta$ ,22-dihydroxycucurbitadienol). (B) the 16-epimer of compound **1** (16 $\alpha$ ,22-dihydroxycucurbitadienol)

The last hydroxyl group is positioned at C-22, as seen from COSY cross peaks from the downfield shifted H-22 ( $\delta$  3.76) to H-20 and H-23. The free rotation around the C17-C20 bond does not allow assignment of configuration at C-20 and C-22, but **1** is tentatively assigned the *S*-configuration at C-20 in agreement with previous reported cucurbitadienol analogs(Shang, et al. 2014; Itkin, et al. 2016).

Compound **1** is a previously unreported compound. Full assignment of all  $^1\text{H}$  and  $^{13}\text{C}$  resonances as well as correlations observed in COSY, ROESY and HMBC experiments are provided in Supplementary Table 7.

**Supplementary Table 7**  $^1\text{H}$  (600 MHz) and  $^{13}\text{C}$  NMR (150 MHz) spectroscopic data and COSY, HSQC, HMBC, and ROESY correlations of compound **1** acquired in methanol- $d_4$ .

| Pos. | $\delta_{\text{C}}^a$ | $\delta_{\text{H}}$ (nH, multiplicity, $J$ in Hz) <sup>b</sup>                                                                                                                                                                                       | COSY                                                                   | HMBC <sup>c</sup>                                  | ROESY                                                                  |
|------|-----------------------|------------------------------------------------------------------------------------------------------------------------------------------------------------------------------------------------------------------------------------------------------|------------------------------------------------------------------------|----------------------------------------------------|------------------------------------------------------------------------|
| 1    | 22.1                  | 1.55 (2H, m)                                                                                                                                                                                                                                         | H-2B, H-10                                                             | C-10                                               |                                                                        |
| 2    | 30.1                  | A: 1.67 (1H, m)<br>B: 1.91 (1H, m)                                                                                                                                                                                                                   | A: H-2B, H-3<br>B: H-2A, H-3                                           |                                                    | A: H-3<br>B: H-3, H-10                                                 |
| 3    | 77.2                  | 3.44 (1H, br t, $J_{\text{H}3,\text{H}2\text{A}} = J_{\text{H}3,\text{H}2\text{B}} = 2.7$ )                                                                                                                                                          | H-2A, H-2B                                                             |                                                    | H-2A, H2B, H-28, H-29                                                  |
| 4    | 41.7                  |                                                                                                                                                                                                                                                      |                                                                        |                                                    |                                                                        |
| 5    | 143.1                 |                                                                                                                                                                                                                                                      |                                                                        |                                                    |                                                                        |
| 6    | 120.5                 | 5.54 (1H, m)                                                                                                                                                                                                                                         | H-7 $\alpha$ , H-7 $\beta$ , H-10                                      | C-4, C-7, C-8, C-10                                | H-7 $\alpha$ , H-7 $\beta$                                             |
| 7    | 25.1                  | $\alpha$ : 1.81 (1H, br dd, $J_{\text{H}7\alpha,\text{H}7\beta} = 19.2$ ,<br>dd, $J_{\text{H}7\alpha,\text{H}6} = 6.3$ )<br>$\beta$ : 2.41 (1H, br dd, $J_{\text{H}7\alpha,\text{H}7\beta} = 19.2$ ,<br>$J_{\text{H}7\beta,\text{H}8} \approx 8.1$ ) | $\alpha$ : H-6, H-7 $\beta$ , H-8<br>$\beta$ : H-6, H-7 $\alpha$ , H-8 | $\alpha$ : C-5, C-6, C-9,<br>C-14<br>$\beta$ : C-9 | $\alpha$ : H-6, H-7 $\beta$<br>$\beta$ : H-6, H-7 $\alpha$ , H-8, H-19 |

|    |       |                                                                                                                                                                                    |                                                                |                                                           |                                                                                      |
|----|-------|------------------------------------------------------------------------------------------------------------------------------------------------------------------------------------|----------------------------------------------------------------|-----------------------------------------------------------|--------------------------------------------------------------------------------------|
| 8  | 44.7  | 1.85 (1H, m)                                                                                                                                                                       | H-7 $\alpha$ , H-7 $\beta$                                     | C-6, C-7, C-10, C-14, C-15, C-19, C-30                    | H-7 $\beta$ , H-15 $\beta$ , H-18, H-19                                              |
| 9  | 35.2  |                                                                                                                                                                                    |                                                                |                                                           |                                                                                      |
| 10 | 39.5  | 2.30 (1H, br m)                                                                                                                                                                    | H-1, H-6,                                                      |                                                           | H-2B, H-12B, H-28, H-30                                                              |
| 11 | 32.9  | A: 1.50 (1H, m)<br>B: 1.69 (1H, m)                                                                                                                                                 | A: H-11B<br>B: H-11A                                           | A: C-10, C-12<br>B: C-9                                   | A: H-11B, H-18<br>B: H-11A                                                           |
| 12 | 31.5  | A: 1.52 (1H, m)<br>B: 1.73 (1H, m)                                                                                                                                                 | A: H-12B<br>B: H-12A                                           | A: C-9, C-10<br>B: C-15, C-18                             | A: H-15 $\alpha$ , H-12B<br>B: H-10, H-12A                                           |
| 13 | 48.5  |                                                                                                                                                                                    |                                                                |                                                           |                                                                                      |
| 14 | 48.5  |                                                                                                                                                                                    |                                                                |                                                           |                                                                                      |
| 15 | 47.3  | $\alpha$ : 1.92 (1H, dd, $J_{H15\alpha, H15\beta} = 12.1$ , $J_{H15\alpha, H16} = 7.6$ )<br>$\beta$ : 1.23 (1H, dd, $J_{H15\alpha, H15\beta} = 12.1$ , $J_{H15\beta, H16} = 5.8$ ) | $\alpha$ : H-16, H-15 $\beta$<br>$\beta$ : H-16, H-15 $\alpha$ | $\alpha$ : C-14, C-17, C-30<br>$\beta$ : C-14, C-16, C-30 | $\alpha$ : H-12A, H-16, H-15 $\beta$ , H-30<br>$\beta$ : H-7 $\beta$ , H-15 $\alpha$ |
| 16 | 72.6  | 4.42 (1H, td, $J_{H16, H15\alpha} = J_{H16, H17} = 7.6$ , $J_{H16, H15\beta} = 5.8$ )                                                                                              | H-15 $\alpha$ , H-15 $\beta$ , H-17                            | C-15                                                      | H-15 $\alpha$ , H-17, H-22, H-30                                                     |
| 17 | 51.3  | 2.04 (1H, dd, $J_{H17, H20} = 11.2$ , $J_{H17, H16} = 7.6$ )                                                                                                                       | H-16, H-20                                                     | C-15, C-18, C-20                                          | H-16, H-30                                                                           |
| 18 | 16.0  | 1.09 (3H, s)                                                                                                                                                                       |                                                                | C-12, C-13, C-17                                          | H-8, H-11A, H-20                                                                     |
| 19 | 28.3  | 0.95 (3H, s)                                                                                                                                                                       |                                                                | C-8, C-9, C-10, C-11                                      | H-7 $\beta$ , H-8                                                                    |
| 20 | 36.0  | 2.12 (1H, m)                                                                                                                                                                       | H-17, H-21                                                     |                                                           | H-18, H-22                                                                           |
| 21 | 14.4  | 0.95 (3H, d, $J_{H21, H20} = 6.6$ Hz)                                                                                                                                              | H-20                                                           | C-20, C-17, C-22                                          | H-22, H-23                                                                           |
| 22 | 76.2  | 3.76 (1H, br ddd, $J_{H22, H23} \approx 7.3$ , $J_{H22, H23} \approx 6.3$ , $J_{H22, H20} = 1.5$ )                                                                                 | H-23                                                           | C-17, C-21, C-24                                          | H-16, H-20, H-21, H-23, H-24                                                         |
| 23 | 33.3  | 2.17 (2H, m)                                                                                                                                                                       | H-22, H-24, H-26, H-27                                         | C-20, C-22, C-24, C-25                                    | H-21, H-22, H-24                                                                     |
| 24 | 122.9 | 5.25 (1H, br t, $J_{H24, H23} = 7.2$ )                                                                                                                                             | H-23, H-26, H-27                                               | C-27                                                      | H-22, H-23, H-27                                                                     |
| 25 | 133.1 |                                                                                                                                                                                    |                                                                |                                                           |                                                                                      |
| 26 | 17.8  | 1.63 (3H, br s)                                                                                                                                                                    | H-23, H-24                                                     | C-24, C-25, C-27                                          |                                                                                      |
| 27 | 25.7  | 1.70 (3H, q, $J_{H27, H23} \approx J_{H27, H24} \approx 1.2$ )                                                                                                                     | H-23, H-24                                                     | C-24, C-25, C-26                                          | H-24                                                                                 |
| 28 | 28.0  | 1.01 (3H, s)                                                                                                                                                                       |                                                                | C-3, C-4, C-5, C-29                                       | H-3, H-10                                                                            |
| 29 | 25.8  | 1.11 (3H, s)                                                                                                                                                                       |                                                                | C-3, C-4, C-5, C-28                                       | H-3                                                                                  |
| 30 | 19.5  | 0.89 (3H, s)                                                                                                                                                                       |                                                                | C-8, C-14, C-15                                           | H-10, H-15 $\alpha$ , H-16, H-17                                                     |

<sup>a</sup> <sup>13</sup>C chemical shift data obtained from HSQC and HMBC spectra. <sup>b</sup> Multiplicities reported as apparent splittings with s = singlet, d = doublet, t = triplet, q = quartet, m = multiplet, br = broad with spin-spin coupling constants listed in the order of the reported multiplicity. <sup>c</sup> Correlations from H to indicated C in this column.

## Compound 2: 16 $\beta$ -hydroxycucurbitadienol

Approximately 1 mg of **2** was dissolved in 650  $\mu\text{l}$  methanol- $d_4$ , and 1D  $^1\text{H}$  NMR as well as 2D COSY and HSQC spectra were acquired and compared with the spectra of **1**. The overlaid spectra of **1** and **2** were almost identical, except that **2** lacked the signal for the oxymethine H-22 observed as a br ddd at  $\delta$  3.76 in **1** but instead contained an additional pair of non-oxygenated diastereotopic methylene protons at  $\delta$  1.64 and  $\delta$  1.03 in **2**. The configuration of the hydroxy groups was assigned  $3\beta$  at C-3 and  $16\beta$  at C-16, based on identical coupling patterns seen for H-3 and H-16 in **1** and **2**.

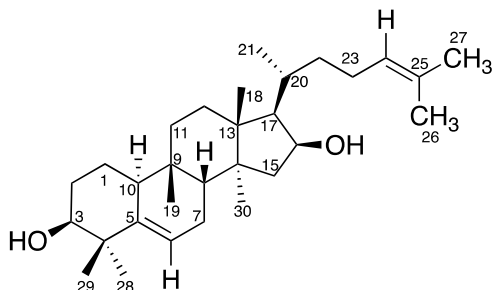

**Supplementary Figure 14** Structure and numbering of  $16\beta$ -hydroxycucurbitadienol (**2**)

Full assignment of all  $^1\text{H}$  and  $^{13}\text{C}$  resonances as well as correlations observed in COSY, ROESY and HMBC experiments are provided in Supplementary Table 8.

**Supplementary Table 8**  $^1\text{H}$  (600 MHz) and  $^{13}\text{C}$  NMR (150 MHz) spectroscopic data and COSY correlations of compound **2** acquired in methanol- $d_4$ .

| Pos. | $\delta_{\text{C}}^a$ | $\delta_{\text{H}}$ (nH, multiplicity, $J$ in Hz) <sup>b</sup>                                                                                                                                                                                                                                                          | COSY                                                       |
|------|-----------------------|-------------------------------------------------------------------------------------------------------------------------------------------------------------------------------------------------------------------------------------------------------------------------------------------------------------------------|------------------------------------------------------------|
| 1    | 22.1                  | 1.54 (2H, m)                                                                                                                                                                                                                                                                                                            | H-2A, H-2B, H-10                                           |
| 2    | 30.0                  | A: 1.67 (1H, m)<br>B: 1.91 (1H, m)                                                                                                                                                                                                                                                                                      | A: H-2B, H-3<br>B: H-2A, H-3                               |
| 3    | 77.1                  | 3.44 (1H, t, $J_{\text{H}3,\text{H}2\text{A}} = J_{\text{H}3,\text{H}2\text{B}} = 2.8$ )                                                                                                                                                                                                                                | H-2A, H-2B                                                 |
| 4    | n.d.                  |                                                                                                                                                                                                                                                                                                                         |                                                            |
| 5    | n.d.                  |                                                                                                                                                                                                                                                                                                                         |                                                            |
| 6    | 120.5                 | 5.53 (1H, dt, $J_{\text{H}6,\text{H}7\alpha} = 6.1$ , $J_{\text{H}6,\text{H}7\beta} \approx J_{\text{H}6,\text{H}10} \approx 1.8$ )                                                                                                                                                                                     | H-7 $\alpha$ , H-7 $\beta$ , H-10                          |
| 7    | 25.0                  | $\alpha$ : 1.81 (1H, br dd, $J_{\text{H}7\alpha,\text{H}7\beta} = 18.9$ , dd, $J_{\text{H}7\alpha,\text{H}6} = 6.1$ )<br>$\beta$ : 2.41 (1H, dddd, $J_{\text{H}7\alpha,\text{H}7\beta} = 18.9$ , $J_{\text{H}7\beta,\text{H}8} = 8.0$ , $J_{\text{H}7\beta,\text{H}16} = 1.8$ , $J_{\text{H}7\beta,\text{H}10} = 3.3$ ) | $\alpha$ : H-6, H-7 $\beta$<br>$\beta$ : H-8, H-7 $\alpha$ |
| 8    | 44.5                  | 1.83 (1H, br d, $J_{\text{H}8-\text{H}7\beta} = 8.0$ )                                                                                                                                                                                                                                                                  | H-7 $\beta$                                                |
| 9    | n.d.                  |                                                                                                                                                                                                                                                                                                                         |                                                            |
| 10   | 39.4                  | 2.28 (1H, br m)                                                                                                                                                                                                                                                                                                         | H-1, H-6,                                                  |
| 11   | 32.9                  | A: 1.48 (1H, m)<br>B: 1.68 (1H, m)                                                                                                                                                                                                                                                                                      | A: H-11B<br>B: H-11A                                       |
| 12   | 31.2                  | A: 1.53 (1H, m)<br>B: 1.71 (1H, m)                                                                                                                                                                                                                                                                                      | A: H-12B<br>B: H-12A                                       |
| 13   | n.d.                  |                                                                                                                                                                                                                                                                                                                         |                                                            |
| 14   | n.d.                  |                                                                                                                                                                                                                                                                                                                         |                                                            |
| 15   | 47.7                  | $\alpha$ : 1.92 (1H, dd, $J_{\text{H}15\alpha,\text{H}15\beta} = 12.1$ , $J_{\text{H}15\alpha,\text{H}16} = 7.8$ )                                                                                                                                                                                                      | $\alpha$ : H-16, H-15 $\beta$                              |

|    |       |                                                                                                                  |                                     |
|----|-------|------------------------------------------------------------------------------------------------------------------|-------------------------------------|
|    |       | $\beta$ : 1.21 (1H, ddd, $J_{H15\alpha,H15\beta} = 12.1$ , $J_{H15\beta,H16} = 5.8$ , $J_{H15\beta,H30} = 1.2$ ) | $\beta$ : H-16, H-15 $\alpha$       |
| 16 | 72.7  | 4.38 (1H, td, $J_{H16,H15\alpha} = J_{H16,H17} = 7.7$ , $J_{H16,H15\beta} = 5.8$ )                               | H-15 $\alpha$ , H-15 $\beta$ , H-17 |
| 17 | 55.4  | 1.65 (1H, m)                                                                                                     | H-16, H-20                          |
| 18 | 16.0  | 1.05 (3H, s)                                                                                                     |                                     |
| 19 | 28.3  | 0.94 (3H, s)                                                                                                     |                                     |
| 20 | 31.1  | 1.86 (1H, m)                                                                                                     | H-17, H-21, H-22                    |
| 21 | 18.5  | 0.96 (3H, d, $J_{H21,H20} = 6.6$ Hz)                                                                             | H-20, H-22                          |
| 22 | 37.4  | A: 1.03 (1H, m)<br>B: 1.65 (1H, m)                                                                               | H-20, H-21, H-23                    |
| 23 | 25.8  | A: 1.94 (1H, m)<br>B: 2.08 (1H, m)                                                                               | H-22, H-24                          |
| 24 | 126.2 | 5.15 (1H, triplet of septets, $J_{H24,H23} = 7.2$ , $J_{H24,H26} = J_{H24,H27} = 1.4$ )                          | H-23, H-26, H-27                    |
| 25 | n.d.  |                                                                                                                  |                                     |
| 26 | 17.4  | 1.60 (3H, br s)                                                                                                  | H-24                                |
| 27 | 25.6  | 1.66 (3H, q, $J_{H27,H23} \approx J_{H27,H24} \approx 1.1$ )                                                     | H-24                                |
| 28 | 27.9  | 1.00 (3H, s)                                                                                                     |                                     |
| 29 | 25.8  | 1.11 (3H, s)                                                                                                     |                                     |
| 30 | 19.3  | 0.84 (3H, d, $J_{H30-H15\beta} = 1.2$ )                                                                          |                                     |

<sup>a</sup> <sup>13</sup>C chemical shift data obtained from HSQC and HMBC spectra. <sup>b</sup> Multiplicities reported as apparent splittings with s = singlet, d = doublet, t = triplet, q = quartet, m = multiplet, br = broad with spin-spin coupling constants listed in the order of the reported multiplicity.

### Compound 3: Cucurbitadienol

Approximately 1 mg of compound **3** was dissolved in 650  $\mu$ l methanol-*d*<sub>4</sub>, and 1D <sup>1</sup>H NMR as well as 2D COSY and HSQC spectra were acquired and compared with the spectra of **1** and **2** as well as NMR data of cucurbitadienol reported in the literature (Itkin, et al. 2016). Thus unambiguously established the structure of **3** as cucurbitadienol (Supplementary Figure 15).

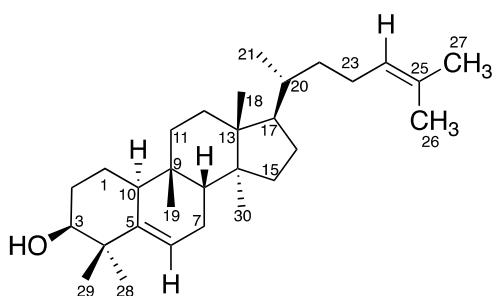

### Supplementary Figure 15 Structure and numbering of cucurbitadienol (3)

Full assignment of all <sup>1</sup>H and <sup>13</sup>C resonances as well as correlations observed in COSY, ROESY and HMBC experiments are provided in Supplementary Table 9.

**Supplementary Table 9**  $^1\text{H}$  (600 MHz) and  $^{13}\text{C}$  NMR (150 MHz) spectroscopic data of compound **3** acquired in methanol- $d_4$  and comparison with data from literature (Itkin, et al. 2016).

| Pos. | NMR data acquired of <b>3</b> in this study                                                                                                                                                                                                                                                                             |       | NMR data of <b>3</b> found in the literature (Itkin, et al. 2016) |                 |
|------|-------------------------------------------------------------------------------------------------------------------------------------------------------------------------------------------------------------------------------------------------------------------------------------------------------------------------|-------|-------------------------------------------------------------------|-----------------|
|      | $\delta_{\text{H}}$ (nH, multiplicity, $J$ in Hz) <sup>b</sup>                                                                                                                                                                                                                                                          | HSQC  | 1D $^1\text{H}$                                                   | $^{13}\text{C}$ |
| 1    | 1.56 (2H, m)                                                                                                                                                                                                                                                                                                            | 22.0  | 1.46, 1.57                                                        | 21.14           |
| 2    | A: 1.68 (1H, m)<br>B: 1.92 (1H, m)                                                                                                                                                                                                                                                                                      | 29.9  | 1.71, 1.88                                                        | 28.90           |
| 3    | 3.45 (1H, t, $J_{\text{H3},\text{H2A}} = J_{\text{H3},\text{H2B}} = 2.8$ )                                                                                                                                                                                                                                              | 77.1  | 3.47                                                              | 76.66           |
| 4    |                                                                                                                                                                                                                                                                                                                         | n.d.  |                                                                   | 41.45           |
| 5    |                                                                                                                                                                                                                                                                                                                         | n.d.  |                                                                   | 141.23          |
| 6    | 5.53 (1H, br dt, $J_{\text{H6},\text{H7}\alpha} = 5.9$ , $J_{\text{H6},\text{H7}\beta} \approx J_{\text{H6},\text{H10}} \approx 1.8$ )                                                                                                                                                                                  | 120.6 | 5.59                                                              | 121.51          |
| 7    | $\alpha$ : 1.83 (1H, br dd, $J_{\text{H7}\alpha,\text{H7}\beta} = 18.8$ , dd, $J_{\text{H7}\alpha,\text{H6}} = 5.9$ )<br>$\beta$ : 2.39 (1H, dddd, $J_{\text{H7}\alpha,\text{H7}\beta} = 18.8$ , $J_{\text{H7}\beta,\text{H8}} = 7.9$ , $J_{\text{H7}\beta,\text{H16}} = 2.2$ , $J_{\text{H7}\beta,\text{H10}} = 3.3$ ) | 25.0  | 1.80, 2.38                                                        | 24.39           |
| 8    | 1.77 (1H, br d, $J_{\text{H8}-\text{H7}\beta} = 8.1$ )                                                                                                                                                                                                                                                                  | 44.9  | 1.76                                                              | 43.67           |
| 9    |                                                                                                                                                                                                                                                                                                                         |       |                                                                   | 34.49           |
| 10   | 2.32 (1H, m)                                                                                                                                                                                                                                                                                                            | 39.2  | 2.27                                                              | 37.85           |
| 11   | A: 1.41 (1H, m)<br>B: 1.70 (1H, m)                                                                                                                                                                                                                                                                                      | 33.2  | 1.44, 1.66                                                        | 32.34           |
| 12   | A: 1.54 (1H, m)<br>B: 1.72 (1H, m)                                                                                                                                                                                                                                                                                      | 31.4  | 1.51, 1.68                                                        | 30.46           |
| 13   |                                                                                                                                                                                                                                                                                                                         | n.d.  |                                                                   | 46.27           |
| 14   |                                                                                                                                                                                                                                                                                                                         | n.d.  |                                                                   | 49.17           |
| 15   | A: 1.17 (1H, m)<br>B: 1.24 (1H, m)                                                                                                                                                                                                                                                                                      | 35.5  | 1.12, 1.20                                                        | 34.77           |
| 16   | A: 1.29 (1H, m)<br>B: 1.92 (1H, m)                                                                                                                                                                                                                                                                                      | 28.8  | 1.27, 1.88                                                        | 27.94           |
| 17   | 1.53 (m)                                                                                                                                                                                                                                                                                                                | 51.5  | 1.50                                                              | 50.47           |
| 18   | 0.89 (3H, s)                                                                                                                                                                                                                                                                                                            | 18.1  | 0.85                                                              | 15.37           |
| 19   | 0.94 (3H, s)                                                                                                                                                                                                                                                                                                            | 28.2  | 0.92                                                              | 28.06           |
| 20   | n.d.                                                                                                                                                                                                                                                                                                                    | n.d.  | 1.43                                                              | 35.82           |
| 21   | 0.93 (3H, d, $J_{\text{H21},\text{H20}} = 6.5$ Hz)                                                                                                                                                                                                                                                                      | 18.9  | 0.90                                                              | 18.67           |
| 22   | A: 1.06 (1H, m)<br>B: 1.46 (1H, m)                                                                                                                                                                                                                                                                                      | 37.1  | 1.03, 1.42                                                        | 36.46           |
| 23   | A: 1.90 (1H, m)<br>B: 2.04 (1H, m)                                                                                                                                                                                                                                                                                      | 25.5  | 1.85, 2.02                                                        | 24.87           |
| 24   | 5.09 (1H, broad triplet of septets, $J_{\text{H24},\text{H23}} = 7.2$ , $J_{\text{H24},\text{H26}} = J_{\text{H24},\text{H27}} = 1.4$ )                                                                                                                                                                                 | 125.9 | 5.09                                                              | 125.25          |
| 25   |                                                                                                                                                                                                                                                                                                                         | n.d.  |                                                                   | 130.94          |
| 26   | 1.59 (3H, s)                                                                                                                                                                                                                                                                                                            | 17.3  | 1.68                                                              | 25.73           |
| 27   | 1.67 (3H, s)                                                                                                                                                                                                                                                                                                            | 25.6  | 1.60                                                              | 17.63           |
| 28   | 1.02 (3H, s)                                                                                                                                                                                                                                                                                                            | 28.1  | 1.02                                                              | 27.26           |
| 29   | 1.12 (3H, s)                                                                                                                                                                                                                                                                                                            | 25.7  | 1.14                                                              | 25.44           |
| 30   | 0.86 (3H, br s)                                                                                                                                                                                                                                                                                                         | 18.1  | 0.80                                                              | 17.83           |

<sup>a</sup> Multiplicities reported as apparent splittings with s = singlet, d = doublet, t = triplet, q = quartet, m = multiplet, br = broad with spin-spin coupling constants listed in the order of the reported multiplicity. <sup>b</sup>  $^{13}\text{C}$  chemical shift data obtained from HSQC spectrum. n.d. = not detected.



## Compound 4: Cucurbitacin E

1 mg of a reference sample of cucurbitacin E bought from Sigma-Aldrich was dissolved in 650  $\mu\text{l}$  methanol- $d_4$ , and 1D  $^1\text{H}$  NMR as well as 2D COSY, NOESY, ROESY, HSQC, and HMBC spectra were acquired. Analysis of the COSY spectrum led to identification of the CH(1)-CH(10), CH(6)-CH<sub>2</sub>(7)-CH(8), CH<sub>2</sub>(12), CH<sub>2</sub>(15)-CHO(16)-CH(17), and CH(23)-CH(24) spin systems indicated with blue in Supplementary Figure 16A, and the HMBC spectrum allowed assemblance of the molecule (selected HMBC correlations shown in Supplementary Figure 16B). The orientation of all hydrogens and groups were identified based on analysis of coupling patterns and correlations found in the ROESY spectrum. Thus, in the ROESY spectrum, a network of correlations between H-19  $\leftrightarrow$  H-8  $\leftrightarrow$  H-15 $\beta$   $\leftrightarrow$  H-16  $\leftrightarrow$  H-18 ( $\leftrightarrow$  H-8)  $\leftrightarrow$  H-12 $\beta$   $\leftrightarrow$  H-8 showed these to be  $\beta$ -positioned (above the plane of the core skeleton) as seen in Supplementary Figure 16C. Similarly, a network of correlations between H-28  $\leftrightarrow$  H-10  $\leftrightarrow$  H-30 ( $\leftrightarrow$  H-15 $\alpha$   $\leftrightarrow$  H-7 $\alpha$   $\leftrightarrow$  H-30)  $\leftrightarrow$  H-12 $\alpha$  showed these to be  $\alpha$ -positioned (below the plane of the core skeleton) as seen in Supplementary Figure 16D. The pseudo-equatorial  $\beta$ -position of H-16 (as seen from the above-mentioned ROEs) leads to an  $\alpha$ -positioned 16-hydroxyl group, as previously reported for cucurbitacin E (Ayyad, et al. 2012; Chawech, et al. 2015). The doublet of doublet of doublet coupling pattern ( $J_{\text{H16,H15}\alpha} = 8.9$ ,  $J_{\text{H16,H17}} = 7.3$ ,  $J_{\text{H16,H15}\beta} = 1.1$ ) observed for H-16 in **4** ( $\alpha$ -oriented 16-hydroxyl) is in close accordance with the coupling constants calculated for an  $\alpha$ -oriented 16-hydroxyl in **1**, *vide supra*, and differs from the coupling pattern observed for H-16 in **1** ( $\beta$ -oriented 16-hydroxyl). This further confirms the  $16\beta$ -hydroxyl in **1** and the  $16\alpha$ -hydroxyl in **4**.

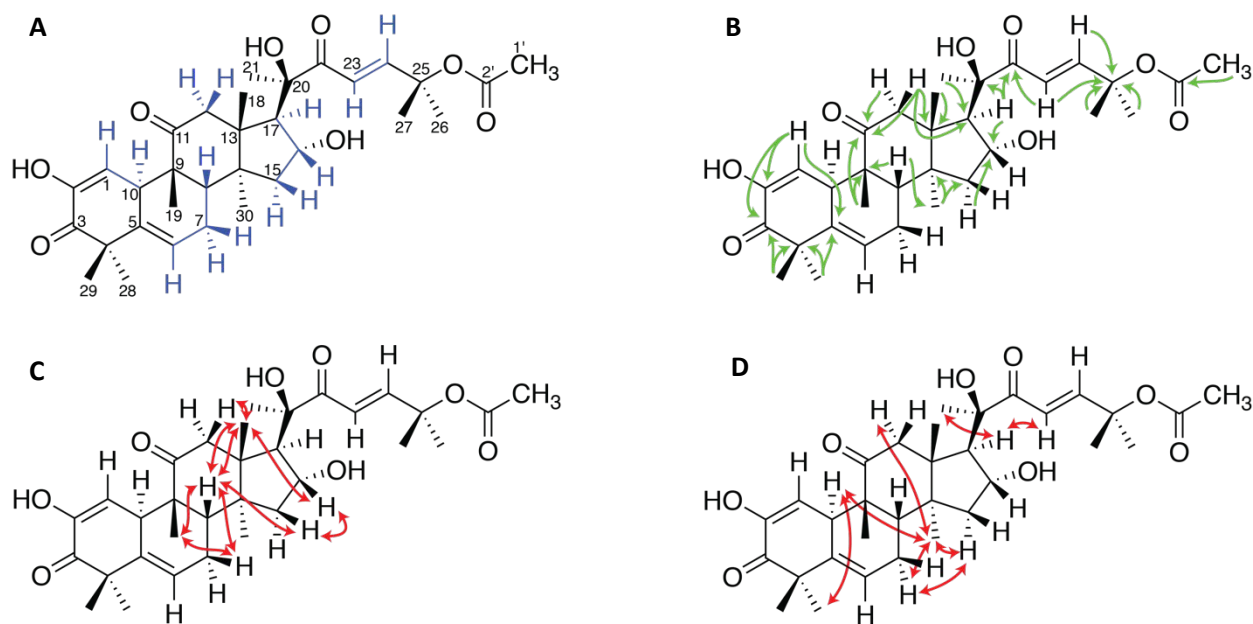

**Supplementary Figure 16 (A)** Structure and numbering of cucurbitacin E with correlations found in the COSY spectrum indicated in blue. **(B)** Selected HMBC correlations used for structure elucidation with  $^1J_{\text{C,H}}$  optimized for 8 Hz (arrows pointing from H to C). **(C)** Correlations from the ROESY spectrum used to identify  $\beta$ -oriented protons, i.e., pointing up, starting with H-8 as the anchoring point. **(D)** Correlations from the ROESY spectrum used to identify  $\alpha$ -oriented protons, i.e., pointing down, starting with H-10 as the anchoring point.

Full assignment of all  $^1\text{H}$  and  $^{13}\text{C}$  resonances as well as correlations observed in COSY, HSQC, ROESY and HMBC experiments are provided in Supplementary Table 10, and they are in agreement with  $^1\text{H}$  and  $^{13}\text{C}$  NMR data of cucurbitacins and their glycosides as reported in literature (Ayyad, et al. 2012; Chawech, et al. 2015; Abdelkhalek, et al. 2017).

**Supplementary Table 10  $^1\text{H}$  (600 MHz) and  $^{13}\text{C}$  NMR (150 MHz) spectroscopic data and COSY, HSQC, HMBC and ROESY correlations of compound 4 in methanol- $d_4$ .**

| Pos. | $\delta_{\text{C}}^a$ | $\delta_{\text{H}}$ (nH, multiplicity, $J$ in Hz) <sup>b</sup>                                                                                                                                                                                                                                                                                               | COSY                                                                          | HMBC <sup>c</sup>                                               | NOESY                                                                                         |
|------|-----------------------|--------------------------------------------------------------------------------------------------------------------------------------------------------------------------------------------------------------------------------------------------------------------------------------------------------------------------------------------------------------|-------------------------------------------------------------------------------|-----------------------------------------------------------------|-----------------------------------------------------------------------------------------------|
| 1    | 116.4                 | 5.75 (1H, d, $J_{\text{H}1,\text{H}10} = 2.7$ )                                                                                                                                                                                                                                                                                                              | H-10                                                                          | C-2, C-3, C-5, C-9                                              | H-10, H-19                                                                                    |
| 2    | 146.6                 | -                                                                                                                                                                                                                                                                                                                                                            |                                                                               |                                                                 |                                                                                               |
| 3    | 199.8                 | -                                                                                                                                                                                                                                                                                                                                                            |                                                                               |                                                                 |                                                                                               |
| 4    | 49.0                  | -                                                                                                                                                                                                                                                                                                                                                            |                                                                               |                                                                 |                                                                                               |
| 5    | 138.3                 | -                                                                                                                                                                                                                                                                                                                                                            |                                                                               |                                                                 |                                                                                               |
| 6    | 121.5                 | 5.80 (1H, br dt, $J_{\text{H}6,\text{H}7\beta} = 4.9$ , $J_{\text{H}6,\text{H}7\alpha} \approx 2.7$ , $J_{\text{H}6,\text{H}10} \approx 2.5$ )                                                                                                                                                                                                               | H-7 $\alpha$ , H-7 $\beta$ , H-8, H-10                                        |                                                                 | H-7 $\alpha$ , H-7 $\beta$ , H-29                                                             |
| 7    | 24.4                  | $\alpha$ : 2.07 (1H, ddd, $J_{\text{H}7\alpha,\text{H}7\beta} = 19.7$ , $J_{\text{H}7\alpha,\text{H}6} = 4.9$ , $J_{\text{H}7\alpha,\text{H}10} = 2.1$ )<br>$\beta$ : 2.39 (1H, ddt, $J_{\text{H}7\beta,\text{H}7\alpha} = 19.7$ , $J_{\text{H}7\beta,\text{H}8} = 8.7$ , $J_{\text{H}7\beta,\text{H}6} \approx J_{\text{H}7\beta,\text{H}10} \approx 2.7$ ) | $\alpha$ : H-6, H-7 $\beta$ , H-10<br>$\beta$ : H-6, H-7 $\alpha$ , H-8, H-10 | $\alpha$ : C-5, C-6, C-8, C-9, C-13                             | $\alpha$ : H-6, H-7 $\beta$ , H-15 $\alpha$ , H-30<br>$\beta$ : H-6, H-7 $\alpha$ , H-8, H-19 |
| 8    | 43.1                  | 2.03 (1H, d, $J_{\text{H}8,\text{H}7\beta} = 8.7$ )                                                                                                                                                                                                                                                                                                          | H-7 $\beta$                                                                   | C-6, C-7, C-9, C-10, C-13, C-15, C-19, C-30                     | H-7 $\beta$ , H-15 $\beta$ , H-18, H-19                                                       |
| 9    | 50.0                  | -                                                                                                                                                                                                                                                                                                                                                            |                                                                               |                                                                 |                                                                                               |
| 10   | 35.8                  | 3.64 (1H, br p, $J_{\text{H}10,\text{H}1} \approx J_{\text{H}10,\text{H}6} \approx J_{\text{H}10,\text{H}7\alpha} \approx J_{\text{H}10,\text{H}7\beta} \approx 2.5$ )                                                                                                                                                                                       | H-1, H-6, H-7 $\alpha$ , H-7 $\beta$                                          |                                                                 | H-1, H-12 $\alpha$ , H-28, H-30                                                               |
| 11   | 216.0                 | -                                                                                                                                                                                                                                                                                                                                                            |                                                                               |                                                                 |                                                                                               |
| 12   | 49.5                  | $\alpha$ : 3.34 (1H, d, $J_{\text{H}12\alpha,\text{H}12\beta} = 14.7$ )<br>$\beta$ : 2.56 (1H, d, $J_{\text{H}12\beta,\text{H}12\alpha} = 14.7$ )                                                                                                                                                                                                            | $\alpha$ : H-12 $\beta$<br>$\beta$ : H-12 $\alpha$                            | $\alpha$ : C-11, C-13, C-17, C-18<br>$\beta$ : C-11, C-13, C-18 | $\alpha$ : H-10, H-12 $\beta$ , H-30<br>$\beta$ : H-12 $\alpha$ , H-18, H-21                  |
| 13   | 51.5                  | -                                                                                                                                                                                                                                                                                                                                                            |                                                                               |                                                                 |                                                                                               |
| 14   | 48.9                  | -                                                                                                                                                                                                                                                                                                                                                            |                                                                               |                                                                 |                                                                                               |
| 15   | 46.5                  | $\alpha$ : 1.46 (1H, br d, $J_{\text{H}15\alpha,\text{H}15\beta} = 13.2$ )<br>$\beta$ : 1.87 (1H, dd, $J_{\text{H}15\beta,\text{H}15\alpha} = 13.2$ , $J_{\text{H}15\beta,\text{H}16} = 8.9$ )                                                                                                                                                               | $\alpha$ : H-15 $\beta$ , H-16<br>$\beta$ : H-15 $\alpha$ , H-16              | $\alpha$ : C-13, C-14, C-16, C-17, C-30<br>$\beta$ : C-8, C-30  | $\alpha$ : H-7 $\alpha$ , H-15 $\beta$<br>$\beta$ : H-8, H-15 $\alpha$ , H-18                 |
| 16   | 71.7                  | 4.57 (1H, ddd, $J_{\text{H}16,\text{H}15\beta} = 8.9$ , $J_{\text{H}16,\text{H}17} = 7.3$ , $J_{\text{H}16,\text{H}15\alpha} = 1.1$ )                                                                                                                                                                                                                        | H-15 $\alpha$ , H-15 $\beta$ , H-17                                           | C-14, C-20                                                      | H-15 $\beta$ , H-18, H-21(weak), H-23                                                         |
| 17   | 59.8                  | 2.58 (1H, d, $J_{\text{H}17,\text{H}16} = 7.3$ )                                                                                                                                                                                                                                                                                                             | H-16                                                                          | C-13, C-16, C-18, C-20, C-21, C-22                              | H-21, H-23                                                                                    |
| 18   | 20.4                  | 0.89 (3H, s)                                                                                                                                                                                                                                                                                                                                                 |                                                                               | C-12, C-13, C-14, C-17                                          | H-8, H-12 $\beta$ , H-15 $\beta$ , H-16                                                       |
| 19   | 20.0                  | 0.97 (3H, s)                                                                                                                                                                                                                                                                                                                                                 |                                                                               | C-8, C-9, C-10, C-11                                            | H-7 $\beta$ , H-8                                                                             |
| 20   | 80.1                  | -                                                                                                                                                                                                                                                                                                                                                            |                                                                               |                                                                 |                                                                                               |
| 21   | 25.0                  | 1.41 (3H, s)                                                                                                                                                                                                                                                                                                                                                 |                                                                               | C-17, C-20, C-22                                                | H-16(weak), H-17, H-23, H-24                                                                  |

|    |       |                                       |      |                          |                                    |
|----|-------|---------------------------------------|------|--------------------------|------------------------------------|
| 22 | 205.0 | -                                     |      |                          |                                    |
| 23 | 122.5 | 6.84 (d, $J_{H_{23},H_{24}} = 15.8$ ) | H-24 | C-22, C-24, C-25, C-27   | H-16, H-17, H-21, H-26, H-27       |
| 24 | 151.3 | 6.97 (d, $J_{H_{24},H_{23}} = 15.8$ ) | H-23 | C-22, C-23, C-25         | H-21, H-26, H-27                   |
| 25 | 80.8  | -                                     |      |                          |                                    |
| 26 | 26.6  | 1.55 (3H, s)                          |      | C-24, C-25, C-27         | H-23, H-24                         |
| 27 | 26.2  | 1.57 (3H, s)                          |      | C-24, C-25, C-26         | H-23, H-24                         |
| 28 | 28.1  | 1.26 (3H, s)                          |      | C-3, C-4, C-5, C-29      | H-10                               |
| 29 | 20.5  | 1.30 (3H, s)                          |      | C-3, C-4, C-5, C-6, C-28 | H-6                                |
| 30 | 18.7  | 1.41 (3H, s)                          |      | C-8, C-13, C-14, C-15    | H-7 $\alpha$ , H-10, H-12 $\alpha$ |
| 1' | 21.6  | 2.00 (3H, s)                          |      | C-2'                     |                                    |
| 2' | 171.6 | -                                     |      |                          |                                    |

<sup>a</sup> <sup>13</sup>C chemical shift data obtained from HSQC and HMBC spectra. <sup>b</sup> Multiplicities reported as apparent splittings with s = singlet, d = doublet, t = triplet, p = pentet, br = broad with spin-spin coupling constants listed in the order of the reported multiplicity. <sup>c</sup> Correlations from H to indicated C in this column.

A sample of approximately 0.6 mg cucurbitacin E isolated from *Iberis amara* by using HPLC-UV/Vis based fraction collection was dissolved in 650  $\mu$ l methanol-*d*<sub>4</sub>, and a 1D <sup>1</sup>H NMR spectrum was acquired. Supplementary Figure 17 show superimposed 1D <sup>1</sup>H NMR spectra of the authentic cucurbitacin E standard (bottom, blue) and the sample isolated from *I. amara*. (top, red). This clearly demonstrates the two samples to be identical and thereby that the sample isolated from *I. amara* is cucurbitacin E.

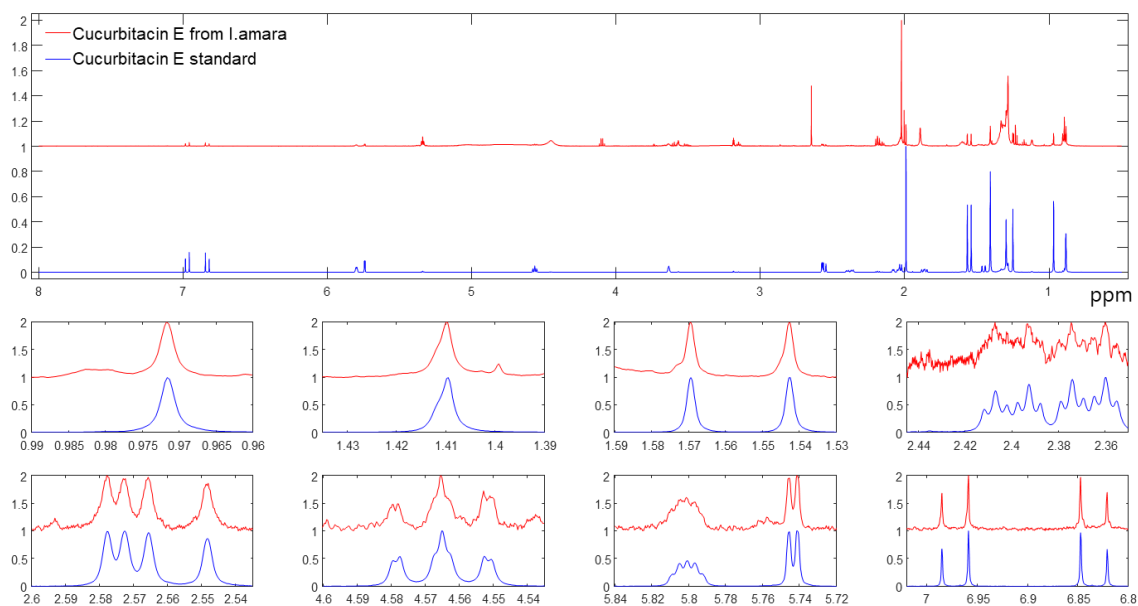

**Supplementary Figure 17 Bottom in blue:** 1D <sup>1</sup>H NMR spectra of the authentic cucurbitacin E standard bought from Sigma-Aldrich. **Top in red:** 1D <sup>1</sup>H NMR spectra of the sample isolated from *I. amara*.

## Compound 5: Cucurbitacin I

1 mg of a reference sample of cucurbitacin I bought from Sigma-Aldrich was dissolved in 650  $\mu\text{l}$  methanol- $d_4$ , and 1D  $^1\text{H}$  NMR as well as 2D COSY, HSQC, and HMBC spectra were acquired. All spectra were identical with the spectra of compound **4**, except for the lack of signals for the acetyl group at C-25 and a downfield shift

A  $\delta$  25 from  $\delta$  80.8 ppm in **4** to  $\delta$  71.2 in **1** due to the lack of acetyl group. Spin systems found in the COSY spectrum are shown in blue in Supplementary Figure 18A and selected HMBC correlations used to assemble the structure are shown in Supplementary Figure 18B.

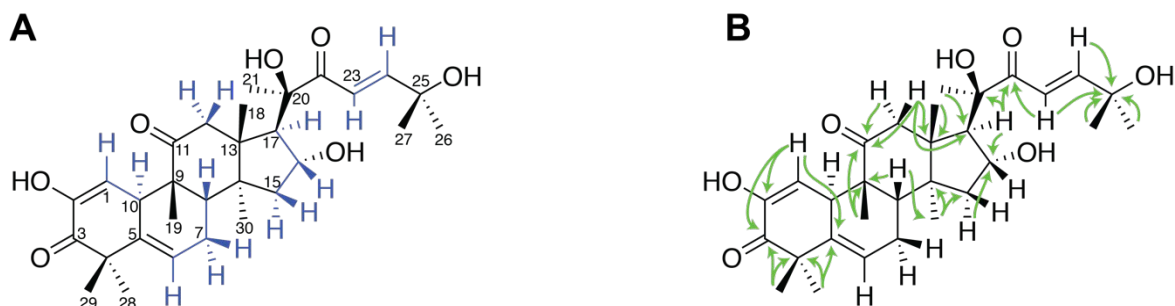

**Supplementary Figure 18 (A)** Structure and numbering of cucurbitacin I with correlations found in the COSY spectrum indicated in blue. **(B)** Selected HMBC correlations used for structure elucidation with  $^nJ_{C,H}$  optimized for 8 Hz (arrows pointing from H to C).

Full assignment of all  $^1\text{H}$  and  $^{13}\text{C}$  resonances as well as correlations observed in COSY, HSQC, and HMBC experiments are provided in Supplementary Table 11, and they are in agreement with  $^1\text{H}$  and  $^{13}\text{C}$  NMR data of cucurbitacins and their glycosides as reported in literature (Seeger, et al. 2005; Ayyad, et al. 2012; Chawech, et al. 2015).

**Supplementary Table 11**  $^1\text{H}$  (600 MHz) and  $^{13}\text{C}$  NMR (150 MHz) spectroscopic data and COSY, HSQC, and HMBC correlations of compound **5** in methanol- $d_4$ .

| Pos. | $\delta_C^a$ | $\delta_H$ (nH, multiplicity, $J$ in Hz) <sup>b</sup>                                                                                                                                                                                                      | COSY                                                                          | HMBC <sup>c</sup>                                 |
|------|--------------|------------------------------------------------------------------------------------------------------------------------------------------------------------------------------------------------------------------------------------------------------------|-------------------------------------------------------------------------------|---------------------------------------------------|
| 1    | 116.5        | 5.76 (1H, d, $J_{H1,H10} = 2.7$ )                                                                                                                                                                                                                          | H-10                                                                          | C-2, C-3, C-5, C-9                                |
| 2    | 146.5        | -                                                                                                                                                                                                                                                          |                                                                               |                                                   |
| 3    | 199.7        | -                                                                                                                                                                                                                                                          |                                                                               |                                                   |
| 4    | 49.0         | -                                                                                                                                                                                                                                                          |                                                                               |                                                   |
| 5    | 138.2        | -                                                                                                                                                                                                                                                          |                                                                               |                                                   |
| 6    | 121.5        | 5.81 (1H, br dt, $J_{H6,H7\alpha} = 4.9$ , $J_{H6,H7\beta} \approx J_{H6,H10} \approx 2.7$ )                                                                                                                                                               | H-7 $\alpha$ , H-7 $\beta$ , H-10                                             | C-4, C-8, C-10                                    |
| 7    | 24.3         | $\alpha$ : 2.07 (1H, ddd, $J_{H7\alpha,H7\beta} = 19.7$ , $J_{H7\alpha,H6} = 4.9$ , $J_{H7\alpha,H10} = 2.0$ )<br>$\beta$ : 2.39 (1H, ddt, $J_{H7\beta,H7\alpha} = 19.7$ , $J_{H7\beta,H8} = 8.6$ , $J_{H7\beta,H6} \approx J_{H7\beta,H10} \approx 2.7$ ) | $\alpha$ : H-6, H-7 $\beta$ , H-10<br>$\beta$ : H-6, H-7 $\alpha$ , H-8, H-10 | $\alpha$ : C-5, C-6, C-8, C-9, C-14               |
| 8    | 43.0         | 2.04 (1H, d, $J_{H8,H7\beta} = 8.6$ )                                                                                                                                                                                                                      | H-7 $\beta$                                                                   | C-6, C-7, C-9, C-10, C-13, C-14, C-15, C-19, C-30 |
| 9    | 50.0         | -                                                                                                                                                                                                                                                          |                                                                               |                                                   |

|    |       |                                                                                                                                                                        |                                                                  |                                                                            |
|----|-------|------------------------------------------------------------------------------------------------------------------------------------------------------------------------|------------------------------------------------------------------|----------------------------------------------------------------------------|
| 10 | 35.8  | 3.64 (1H, br p, $J_{H_{10},H_1} \approx J_{H_{10},H_6} \approx J_{H_{10},H_7\alpha} \approx J_{H_{10},H_7\beta} \approx 2.7$ )                                         | H-1, H-6, H-7 $\alpha$ , H-7 $\beta$                             |                                                                            |
| 11 | 215.9 | -                                                                                                                                                                      |                                                                  |                                                                            |
| 12 | 49.7  | $\alpha$ : 3.37 (1H, dq, $J_{H_{12\alpha},H_{12\beta}} = 14.7$ , $J_{H_{12\alpha},H_{18}} = 1.0$ )<br>$\beta$ : 2.64 (1H, d, $J_{H_{12\beta},H_{12\alpha}} = 14.7$ )   | $\alpha$ : H-12 $\beta$ , H-18<br>$\beta$ : H-12 $\alpha$        | $\alpha$ : C-11, C-13, C-17, C-18<br>$\beta$ : C-11, C-13, C-14, C-18,     |
| 13 | 51.5  | -                                                                                                                                                                      |                                                                  |                                                                            |
| 14 | 48.9  | -                                                                                                                                                                      |                                                                  |                                                                            |
| 15 | 46.6  | $\alpha$ : 1.45 (1H, br d, $J_{H_{15\alpha},H_{15\beta}} = 13.2$ )<br>$\beta$ : 1.87 (1H, dd, $J_{H_{15\beta},H_{15\alpha}} = 13.2$ , $J_{H_{15\beta},H_{16}} = 8.9$ ) | $\alpha$ : H-15 $\beta$ , H-16<br>$\beta$ : H-15 $\alpha$ , H-16 | $\alpha$ : C-13, C-14, C-16, C-17, C-30<br>$\beta$ : C-8, C-14, C-16, C-30 |
| 16 | 71.5  | 4.51 (1H, ddd, $J_{H_{16},H_{15\beta}} = 8.9$ , $J_{H_{16},H_{17}} = 7.3$ , $J_{H_{16},H_{15\alpha}} = 1.1$ )                                                          | H-15 $\alpha$ , H-15 $\beta$ , H-17                              | C-14, C-17, C-20                                                           |
| 17 | 59.4  | 2.61 (1H, d, $J_{H_{17},H_{16}} = 7.3$ )                                                                                                                               | H-16                                                             | C-12, C-13, C-16, C-18, C-20, C-21, C-22                                   |
| 18 | 20.4  | 0.93 (3H, br s)                                                                                                                                                        | H-12 $\alpha$                                                    | C-12, C-13, C-14, C-17                                                     |
| 19 | 20.0  | 0.98 (3H, s)                                                                                                                                                           |                                                                  | C-8, C-9, C-10, C-11                                                       |
| 20 | 79.7  | -                                                                                                                                                                      |                                                                  |                                                                            |
| 21 | 25.1  | 1.41 (3H, s)                                                                                                                                                           |                                                                  | C-17, C-20, C-22                                                           |
| 22 | 204.8 | -                                                                                                                                                                      |                                                                  |                                                                            |
| 23 | 121.1 | 6.84 (d, $J_{H_{23},H_{24}} = 15.4$ )                                                                                                                                  | H-24                                                             | C-22, C-24, C-25, C-26, C-27                                               |
| 24 | 155.1 | 6.97 (d, $J_{H_{24},H_{23}} = 15.4$ )                                                                                                                                  | H-23                                                             | C-22, C-23, C-25, C-26, C-27                                               |
| 25 | 71.2  | -                                                                                                                                                                      |                                                                  |                                                                            |
| 26 | 29.0  | 1.33 (3H, s)                                                                                                                                                           |                                                                  | C-23, C-24, C-25, C-27                                                     |
| 27 | 29.0  | 1.33 (3H, s)                                                                                                                                                           |                                                                  | C-23, C-24, C-25, C-26                                                     |
| 28 | 28.1  | 1.26 (3H, s)                                                                                                                                                           |                                                                  | C-3, C-4, C-5, C-29                                                        |
| 29 | 20.5  | 1.31 (3H, s)                                                                                                                                                           |                                                                  | C-3, C-4, C-5, C-6, C-28                                                   |
| 30 | 18.6  | 1.42 (3H, br s)                                                                                                                                                        |                                                                  | C-8, C-13, C-14, C-15                                                      |

<sup>a</sup> <sup>13</sup>C chemical shift data obtained from HSQC and HMBC spectra. <sup>b</sup> Multiplicities reported as apparent splittings with s = singlet, d = doublet, t = triplet, q = quartet, p = pentet, br = broad with spin-spin coupling constants listed in the order of the reported multiplicity. <sup>c</sup> Correlations from H to indicated C in this column.

Approximately 0.6 mg cucurbitacin I isolated from *Iberis amara* by using HPLC-UV/Vis based fraction collection was dissolved in 650  $\mu$ l methanol-*d*<sub>4</sub>, and a 1D <sup>1</sup>H NMR spectrum was acquired. Supplementary Figure 19 show superimposed 1D <sup>1</sup>H NMR spectra of the authentic cucurbitacin I standard (bottom, blue) and the sample isolated from *I. amara* (top, red). This clearly demonstrates the two samples to be identical and thereby that the sample isolated from *I. amara* is cucurbitacin I.

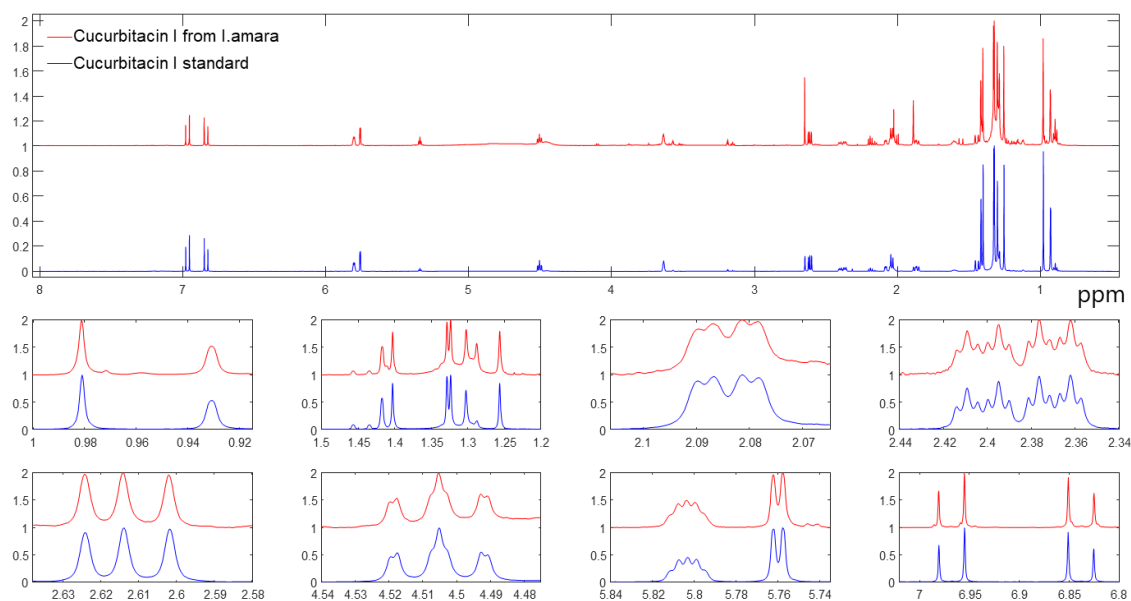

**Supplementary Figure 19 Bottom in blue:** 1D  $^1\text{H}$  NMR spectra of the authentic cucurbitacin I standard bought from Sigma-Aldrich. **Top in red:** 1D  $^1\text{H}$  NMR spectra of the sample isolated from *I. amara*.

## References

- Abdelkhalek AA, Sharaf A-MM, Rabie M, El-Subbagh HI. 2017. Derivatives of Cucurbitacin-E-glucoside produced by *Curvularia lunata* NRRL 2178: anti-inflammatory, antipyretic, antitumor activities, and effect on biochemical parameters. *Future J Pharm Sci* 3:124-130.
- Ayyad S-EN, Abdel-Lateff A, Alarif WM, Patacchioli FR, Badria FA, Ezmirly ST. 2012. In vitro and in vivo study of cucurbitacins-type triterpene glucoside from *Citrullus colocynthis* growing in Saudi Arabia against hepatocellular carcinoma. *Environ Toxicol Pharmacol* 33:245-251.
- Balacco G. 1996. A desktop calculator for the Karplus equation. *J Chem Inf Comput Sci* 36:885-887.
- Chawech R, Jarraya R, Girardi C, Vansteelandt M, Marti G, Nasri I, Racaud-Sultan C, Fabre N. 2015. Cucurbitacins from the leaves of *Citrullus colocynthis* (L.) Schrad. *Molecules* 20:18001-18015.
- Itkin M, Davidovich-Rikanati R, Cohen S, Portnoy V, Doron-Faigenboim A, Oren E, Freilich S, Tzuri G, Baranes N, Shen S. 2016. The biosynthetic pathway of the nonsugar, high-intensity sweetener mogroside V from *Siraitia grosvenorii*. *Proc Natl Acad Sci* 113:E7619-E7628.
- Seger C, Sturm S, Mair ME, Ellmerer EP, Stuppner H. 2005.  $^1\text{H}$  and  $^{13}\text{C}$  NMR signal assignment of cucurbitacin derivatives from *Citrullus colocynthis* (L.) Schrader and *Ecballium elaterium* L.(Cucurbitaceae). *Magn Reson Chem* 43:489-491.
- Shang Y, Ma Y, Zhou Y, Zhang H, Duan L, Chen H, Zeng J, Zhou Q, Wang S, Gu W. 2014. Biosynthesis, regulation, and domestication of bitterness in cucumber. *Science* 346:1084-1088.
